# Supplementary material for: Three-component 2-aryl substituted benzothiophene formation under transition-metal free conditions
Source: Royal Society of Chemistry journal article supplement (doi:10.1039/c6ra07730g), 2016-01-01

## **Supporting Information**

### **Three-component 2-aryl substituted benzothiophene formation under transition-metal free conditions**

Pengcheng Jiang, Xingzong Che, Yunfeng Liao, Huawen Huang\* and Guo-Jun Deng\*

Key Laboratory of Environmentally Friendly Chemistry and Application of Ministry of Education,  
College of Chemistry, Xiangtan University, Xiangtan 411105, China  
E-mail: hwhuang@xtu.edu.cn; gjdeng@xtu.edu.cn

---

## Table of Contents

|                                                                                                             |                |
|-------------------------------------------------------------------------------------------------------------|----------------|
| <b>A. General information.....</b>                                                                          | <b>S2</b>      |
| <b>B. General procedure of the reaction.....</b>                                                            | <b>S2</b>      |
| <b>C. Characterization data of products.....</b>                                                            | <b>S2-S11</b>  |
| <b>D. References.....</b>                                                                                   | <b>S12</b>     |
| <b>E. Copies of <math>^1\text{H}</math> and <math>^{13}\text{C}</math> NMR spectra of the products.....</b> | <b>S13-S35</b> |

---

## A. General information

All experiments were carried out under an atmosphere of air. Flash column chromatography was performed over silica gel (48-75  $\mu\text{m}$ ).  $^1\text{H}$  NMR and  $^{13}\text{C}$  NMR spectra were recorded on Bruker-AV (400 and 100 MHz, respectively) instrument internally referenced to  $\text{SiMe}_4$  or chloroform signals. MS analyses were performed on Agilent 5975 GC-MS instrument (EI). The new compounds were characterized by  $^1\text{H}$  NMR,  $^{13}\text{C}$  NMR, MS and HRMS. The structure of known compounds was further corroborated by comparing their  $^1\text{H}$  NMR,  $^{13}\text{C}$  NMR data and MS data with those of literature. All reagents were used as received from commercial sources without further purification.

## B. General procedure of the reaction

A 10 mL oven-dried reaction vessel was charged with sulphur powder (25.6 mg, 0.8 mmol),  $\text{K}_2\text{CO}_3$  (82.8 mg, 0.6 mmol), methyl 2-phenylacetate (**1a**, 45 mg, 0.3 mmol), 2-bromobenzaldehyde (**2a**, 37.0 mg, 0.2 mmol). The reaction vessel was added DMF (0.5 mL) by syringe. The sealed vessel was stirred at 110  $^\circ\text{C}$  for 16 h. After cooling to room temperature, the volatiles were removed under vacuum and the residue was purified by column chromatography (silica gel, petroleum ether) to give **3a** (37.4 mg) as white solid in 89% yield.

## C. Characterization data of products

### 2-Phenylbenzo[b]thiophene (**3a**, CAS: 1207-95-0)<sup>[1]</sup>

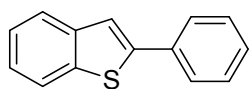

$^1\text{H}$  NMR (400 MHz,  $\text{CDCl}_3$ , ppm)  $\delta$  7.83 (d,  $J = 7.6$  Hz, 1H), 7.77 (d,  $J = 7.2$  Hz, 1H), 7.73-7.71 (m, 2H), 7.55 (s, 1H), 7.45-7.41 (m, 2H), 7.35-7.29 (m, 3H);  $^{13}\text{C}$  NMR (100 MHz,  $\text{CDCl}_3$ , ppm)  $\delta$  144.2, 140.7, 139.5, 134.3, 128.9, 128.2, 126.5, 124.5, 124.3, 123.5, 122.2, 119.4; MS (EI)  $m/z$  (%) 210 (100), 178, 165, 139, 77.

### 5-Methoxy-2-phenylbenzo[b]thiophene (**3b**)<sup>[2]</sup>

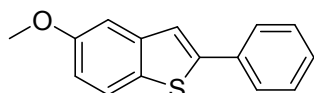

---

The reaction was conducted with **1a** (45 mg, 0.3 mmol) and 2-bromo-5-methoxybenzaldehyde (**2b**, 43.0 mg, 0.2 mmol) under the standard conditions. After cooling to room temperature, the volatiles were removed under vacuum and the residue was purified by column chromatography (silica gel, PE : EA = 50 : 1) to give **3b** (35.1 mg) as white solid in 73% yield.

<sup>1</sup>H NMR (400 MHz, CDCl<sub>3</sub>, ppm) δ 7.69 (m, 3H), 7.47 (s, 1H), 7.42 (t, *J* = 7.2 Hz, 2H), 7.34 (t, *J* = 7.2 Hz, 1H), 7.24 (d, *J* = 2.0 Hz, 1H), 6.97 (dd, *J* = 10.4, *J* = 1.6 Hz, 1H), 3.88 (s, 3H); <sup>13</sup>C NMR (100 MHz, CDCl<sub>3</sub>, ppm) δ 157.7, 145.5, 141.7, 134.4, 132.0, 128.9, 128.2, 126.4, 122.9, 119.3, 114.5, 105.8, 55.5; MS (EI) *m/z* (%) 240 (100), 197, 165, 152, 120.

#### 5-Chloro-2-phenylbenzo[b]thiophene (**3c**, CAS: 101219-31-2)<sup>[1]</sup>

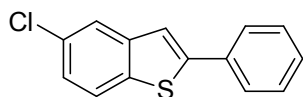

The reaction was conducted with **1a** (45 mg, 0.3 mmol) and 2-bromo-5-chlorobenzaldehyde (**2c**, 43.8 mg, 0.2 mmol) under the standard conditions. After cooling to room temperature, the volatiles were removed under vacuum and the residue was purified by column chromatography (silica gel, petroleum ether) to give **3c** (41.0 mg) as white solid in 84% yield.

<sup>1</sup>H NMR (400 MHz, CDCl<sub>3</sub>, ppm) δ 7.74-7.69 (m, 4H), 7.47-7.36 (m, 4H), 7.28-7.26 (m, 1H); <sup>13</sup>C NMR (100 MHz, CDCl<sub>3</sub>, ppm) δ 146.4, 141.8, 137.6, 133.9, 130.7, 129.0, 128.7, 126.6, 124.7, 123.2, 123.0, 118.6; MS (EI) *m/z* (%) 244 (100), 208, 165, 122, 104.

#### 5-Bromo-2-phenylbenzo[b]thiophene (**3d**, CAS: 7312-09-6)<sup>[2]</sup>

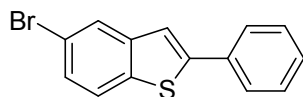

The reaction was conducted with **1a** (45 mg, 0.3 mmol) and 5-bromo-2-fluorobenzaldehyde (**2e**, 40.6 mg, 0.2 mmol) under the standard conditions. After cooling to room temperature, the volatiles were removed under vacuum and the residue was purified by column chromatography (silica gel, petroleum ether) to give **3d** (43.4 mg) as white solid in 74% yield.

<sup>1</sup>H NMR (400 MHz, CDCl<sub>3</sub>, ppm) δ 7.91 (s, 1H), 7.69 (m, 3H), 7.46-7.36 (m, 5H); <sup>13</sup>C NMR (100 MHz, CDCl<sub>3</sub>, ppm) δ 146.2, 142.3, 138.1, 133.8, 129.0, 128.7, 127.3, 126.6, 126.1, 123.6, 118.52, 118.48; MS (EI) *m/z* (%) 290 (100), 208, 165, 145, 104.

### 2-Phenyl-5-(trifluoromethyl)benzo[b]thiophene (3e)

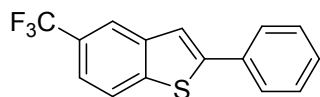

The reaction was conducted with **1a** (45 mg, 0.3 mmol) and 2-fluoro-5-(trifluoromethyl) benzaldehyde (**2f**, 38.4 mg, 0.2 mmol) under the standard conditions. After cooling to room temperature, the volatiles were removed under vacuum and the residue was purified by column chromatography (silica gel, petroleum ether) to give **3e** (48.4 mg) as white solid in 87% yield.

<sup>1</sup>H NMR (400 MHz, CDCl<sub>3</sub>, ppm) δ 8.04 (s, 1H), 7.92 (d, *J* = 8.4 Hz, 1H), 7.72 (d, *J* = 7.6 Hz, 2H), 7.59 (s, 1H), 7.53 (d, *J* = 8.4 Hz, 1H), 7.45 (t, *J* = 7.6 Hz, 2H), 7.40-7.36 (m, 1H); <sup>13</sup>C NMR (100 MHz, CDCl<sub>3</sub>, ppm) δ 146.6, 142.5, 140.2, 133.6, 129.1, 128.8, 127.2 (d, *J* = 32.0 Hz), 126.6, 124.6 (q, *J* = 270 Hz), 122.7, 120.6 (d, *J* = 4.2 Hz), 120.5 (d, *J* = 3.6 Hz), 119.3; HRMS (ESI) calcd. for: C<sub>15</sub>H<sub>10</sub>F<sub>3</sub>S [M+H]<sup>+</sup> 279.04498, found 279.04525.

### 4-Fluoro-2-phenylbenzo[b]thiophene (3f)

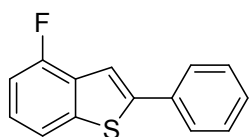

The reaction was conducted with **1a** (45 mg, 0.3 mmol) and 2,6-difluorobenzaldehyde (**2g**, 28.4 mg, 0.2 mmol) under the standard conditions. After cooling to room temperature, the volatiles were removed under vacuum and the residue was purified by column chromatography (silica gel, petroleum ether) to give **3f** (13.7 mg) as white solid in 30% yield.

<sup>1</sup>H NMR (400 MHz, CDCl<sub>3</sub>, ppm) δ 7.72 (d, *J* = 7.6 Hz, 2H), 7.65 (s, 1H), 7.59 (d, *J* = 8.0 Hz, 1H), 7.44 (t, *J* = 7.2 Hz, 2H), 7.37 (d, *J* = 7.2 Hz, 1H), 7.29-7.24 (m, 1H), 7.04-7.00 (m, 1H); <sup>13</sup>C NMR (100 MHz, CDCl<sub>3</sub>, ppm) δ 157.7 (d, *J* = 250 Hz), 144.7, 141.8, 133.8, 129.8 (d, *J* = 15 Hz), 129.0, 128.6, 126.6, 125.1 (d, *J* = 7.2 Hz), 118.0 (d, *J* = 3.9 Hz), 114.2 (d, *J* = 1 Hz), 109.5 (d, *J* = 18.8 Hz); HRMS (ESI) calcd. for: C<sub>14</sub>H<sub>10</sub>FS [M+H]<sup>+</sup> 229.04818, found 229.04726.

### 7-Fluoro-2-phenylbenzo[b]thiophene (3g)

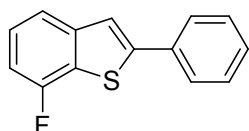

The reaction was conducted with **1a** (45 mg, 0.3 mmol) and 2,3-difluorobenzaldehyde (**2h**, 28.4 mg, 0.2 mmol) under the standard conditions. After cooling to room temperature, the volatiles were removed under vacuum and the residue was purified by column chromatography (silica gel, petroleum ether) to give **3g** (27.8 mg) as white solid in 61% yield.

<sup>1</sup>H NMR (400 MHz, CDCl<sub>3</sub>, ppm) δ 7.72 (d, *J* = 7.6 Hz, 2H), 7.56-7.55 (m, 2H), 7.44 (t, *J* = 7.4 Hz, 2H), 7.39-7.28 (m, 2H), 7.01 (t, *J* = 9.0 Hz, 1H); <sup>13</sup>C NMR (100 MHz, CDCl<sub>3</sub>, ppm) δ 157.5 (d, *J* = 245 Hz), 145.6, 145.0, 133.8, 129.0, 128.7, 126.6, 125.8 (d, *J* = 6.7 Hz), 122.8, 119.5 (d, *J* = 2.2 Hz), 119.3 (d, *J* = 3.3 Hz), 109.4 (d, *J* = 18.4 Hz); HRMS (ESI) calcd. for: C<sub>14</sub>H<sub>10</sub>FS [M+H]<sup>+</sup> 229.04818, found 229.04829.

#### 4-Chloro-2-phenylbenzo[b]thiophene (**3h**)<sup>[2]</sup>

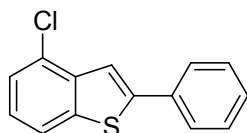

The reaction was conducted with **1a** (45 mg, 0.3 mmol) and 2,6-dichlorobenzaldehyde (**2j**, 35.0 mg, 0.2 mmol) under the standard conditions. After cooling to room temperature, the volatiles were removed under vacuum and the residue was purified by column chromatography (silica gel, petroleum ether) to give **3h** (18.5 mg) as white solid in 38% yield.

<sup>1</sup>H NMR (400 MHz, CDCl<sub>3</sub>, ppm) δ 7.75-7.71 (m, 4H), 7.46-7.42 (m, 2H), 7.39-7.34 (m, 2H), 7.26-7.21 (m, 1H); <sup>13</sup>C NMR (100 MHz, CDCl<sub>3</sub>, ppm) δ 145.3, 140.5, 138.9, 133.8, 129.0, 128.7, 128.5, 126.6, 124.9, 124.5, 120.7, 117.6; MS (EI) *m/z* (%) 244 (100), 208, 165, 122, 104.

#### 7-Chloro-2-phenylbenzo[b]thiophene (**3i**)

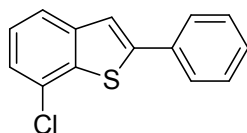

The reaction was conducted with **1a** (45 mg, 0.3 mmol) and 2,3-dichlorobenzaldehyde (**2k**, 35.0 mg, 0.2 mmol) under the standard conditions. After cooling to room temperature, the volatiles were removed under vacuum and the residue was purified by column chromatography (silica gel, petroleum ether) to give **3i** (40.0 mg) as white solid in 82% yield.

<sup>1</sup>H NMR (400 MHz, CDCl<sub>3</sub>, ppm) δ 7.73 (d, *J* = 7.6 Hz, 2H), 7.68-7.66 (m, 1H), 7.57 (s, 1H),

7.44 (t,  $J = 7.4$  Hz, 2H), 7.38 (d,  $J = 7.2$  Hz, 1H), 7.31-7.28 (m, 2H);  $^{13}\text{C}$  NMR (100 MHz,  $\text{CDCl}_3$ , ppm)  $\delta$  145.3, 141.9, 138.6, 133.8, 129.0, 128.6, 127.5, 126.5, 125.7, 123.9, 121.9, 119.9; HRMS (ESI) calcd. for:  $\text{C}_{14}\text{H}_{10}\text{ClS}$   $[\text{M}+\text{H}]^+$  245.01863, found 245.01816.

**2-(4-Methoxyphenyl)benzo[b]thiophene (3j, CAS: 27884-09-9)**<sup>[1]</sup>

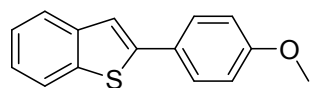

The reaction was conducted with methyl 2-(4-methoxyphenyl)acetate (**1b**, 54.0 mg, 0.3 mmol) and **2a** (37.0 mg, 0.2 mmol) under the standard conditions. After cooling to room temperature, the volatiles were removed under vacuum and the residue was purified by column chromatography (silica gel, PE : EA = 50 : 1) to give **3j** (13.4 mg) as yellow solid in 28% yield.

$^1\text{H}$  NMR (400 MHz,  $\text{CDCl}_3$ , ppm)  $\delta$  7.81 (d,  $J = 8.0$  Hz, 1H), 7.74 (d,  $J = 7.6$  Hz, 1H), 7.65 (d,  $J = 8.4$  Hz, 2H), 7.43 (s, 1H), 7.35-7.26 (m, 2H), 6.96 (d,  $J = 8.8$  Hz, 2H), 3.86 (s, 3H);  $^{13}\text{C}$  NMR (100 MHz,  $\text{CDCl}_3$ , ppm)  $\delta$  159.8, 144.2, 140.9, 139.2, 127.8, 127.1, 124.4, 123.9, 123.2, 122.2, 118.2, 114.4, 55.4; MS (EI)  $m/z$  (%) 240 (100), 225, 207, 197, 120.

**2-(4-Fluorophenyl)benzo[b]thiophene (3k, CAS: 936734-96-2)**<sup>[1]</sup>

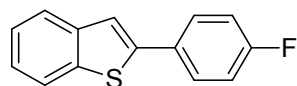

The reaction was conducted with methyl 2-(4-fluorophenyl)acetate (**1c**, 50.4 mg, 0.3 mmol) and **2a** (37.0 mg, 0.2 mmol) under the standard conditions. After cooling to room temperature, the volatiles were removed under vacuum and the residue was purified by column chromatography (silica gel, petroleum ether) to give **3k** (23.3 mg) as white solid in 51% yield.

$^1\text{H}$  NMR (400 MHz,  $\text{CDCl}_3$ , ppm)  $\delta$  7.82 (d,  $J = 7.6$  Hz, 1H), 7.76 (d,  $J = 7.6$  Hz, 1H), 7.69-7.66 (m, 2H), 7.46 (s, 1H), 7.37-7.29 (m, 2H), 7.12 (t,  $J = 8.4$  Hz, 2H);  $^{13}\text{C}$  NMR (100 MHz,  $\text{CDCl}_3$ , ppm)  $\delta$  162.8 (d,  $J = 247$  Hz), 143.1, 140.7, 139.5, 130.6 (d,  $J = 3.4$  Hz), 128.2 (d,  $J = 8.1$  Hz), 124.6, 124.4, 123.5, 122.2, 119.4 (d,  $J = 1.4$  Hz), 115.9 (d,  $J = 21.6$  Hz); MS (EI)  $m/z$  (%) 228 (100), 207, 196, 183, 114.

---

### 2-(4-Chlorophenyl)benzo[b]thiophene (**3l**, CAS: 63676-27-7) <sup>[3]</sup>

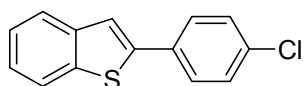

The reaction was conducted with methyl 2-(4-chlorophenyl)acetate (**1d**, 55.2 mg, 0.3 mmol) and **2a** (37.0 mg, 0.2 mmol) under the standard conditions. After cooling to room temperature, the volatiles were removed under vacuum and the residue was purified by column chromatography (silica gel, petroleum ether) to give **3l** (21.0 mg) as white solid in 43% yield.

<sup>1</sup>H NMR (400 MHz, CDCl<sub>3</sub>, ppm) δ 7.81 (d, *J* = 7.6 Hz, 1H), 7.76 (d, *J* = 7.6 Hz, 1H), 7.63 (d, *J* = 8.0 Hz, 2H), 7.51 (s, 1H), 7.39 (d, *J* = 8.4 Hz, 2H), 7.36-7.30 (m, 2H); <sup>13</sup>C NMR (100 MHz, CDCl<sub>3</sub>, ppm) δ 142.8, 140.6, 139.5, 134.1, 132.9, 129.1, 127.6, 124.7, 124.6, 123.7, 122.3, 119.9; MS (EI) *m/z* (%) 244(100), 208, 165, 122, 104.

### 2-(4-Bromophenyl)benzo[b]thiophene (**3m**)

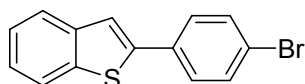

The reaction was conducted with methyl 2-(4-bromophenyl)acetate (**1e**, 68.7 mg, 0.3 mmol) and **2a** (37.0 mg, 0.2 mmol) under the standard conditions. After cooling to room temperature, the volatiles were removed under vacuum and the residue was purified by column chromatography (silica gel, petroleum ether) to give **3m** (27.7 mg) as white solid in 48% yield.

<sup>1</sup>H NMR (400 MHz, CDCl<sub>3</sub>, ppm) δ 7.82 (d, *J* = 7.6 Hz, 1H), 7.77 (d, *J* = 7.2 Hz, 1H), 7.59-7.56 (m, 4H), 7.53 (s, 1H), 7.38-7.30 (m, 2H); <sup>13</sup>C NMR (100 MHz, CDCl<sub>3</sub>, ppm) δ 142.9, 140.6, 139.5, 133.3, 132.1, 127.9, 124.7, 124.6, 123.7, 122.3, 122.2, 119.9; HRMS (ESI) calcd. for: C<sub>14</sub>H<sub>10</sub>BrS [M+H]<sup>+</sup> 288.96762, found 288.96811.

### 4-(Benzo[b]thiophen-2-yl)aniline (**3n**)

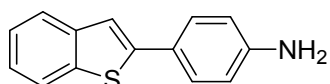

The reaction was conducted with methyl 2-(4-aminophenyl)acetate (**1f**, 49.5 mg, 0.3 mmol) and **2a** (37.0 mg, 0.2 mmol) under the standard conditions. After cooling to room temperature, the volatiles were removed under vacuum and the residue was purified by column chromatography



(silica gel, EA : PE = 10:1) to give **3n** (13.5 mg) as yellow solid in 30% yield.

<sup>1</sup>H NMR (400 MHz, CDCl<sub>3</sub>, ppm) δ 7.78 (d, *J* = 8.0 Hz, 1H), 7.71 (d, *J* = 7.6 Hz, 1H), 7.52 (d, *J* = 8.0 Hz, 2H), 7.37 (s, 1H), 7.31 (t, *J* = 7.6 Hz, 1H), 7.27-7.23 (m, 1H), 6.72 (d, *J* = 8.0 Hz, 2H), 3.80 (s, 2H); <sup>13</sup>C NMR (100 MHz, CDCl<sub>3</sub>, ppm) δ 146.7, 141.0, 138.9, 136.2, 127.7, 124.8, 124.3, 123.6, 123.0, 122.1, 117.2, 115.2; HRMS (ESI) calcd. for: C<sub>14</sub>H<sub>12</sub>NS [M+H]<sup>+</sup> 226.06850, found 226.06831.

### 2-(4-Nitrophenyl)benzo[b]thiophene (**3o**, CAS : 54492-94-3)<sup>[1]</sup>

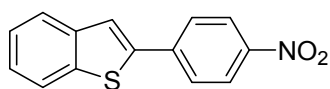

The reaction was conducted with methyl 2-(4-nitrophenyl)acetate (**1g**, 58.5 mg, 0.3 mmol) and **2a** (37.0 mg, 0.2 mmol) under the standard conditions. After cooling to room temperature, the volatiles were removed under vacuum and the residue was purified by column chromatography (silica gel, PE : EA = 10 : 1) to give **3o** (25.5 mg) as yellow solid in 50% yield.

<sup>1</sup>H NMR (400 MHz, CDCl<sub>3</sub>, ppm) δ 8.28 (d, *J* = 8.8 Hz 2H), 7.86-7.83 (m, 4H), 7.71 (s, 1H), 7.40-7.39 (m, 2H); <sup>13</sup>C NMR (100 MHz, CDCl<sub>3</sub>, ppm) δ 147.2, 141.2, 140.6, 140.3, 140.2, 126.8, 125.5, 125.0, 124.4, 124.3, 122.43, 122.41; MS (EI) *m/z* (%) 225 (100), 209, 133, 122, 77.

### 2-(3-Methoxyphenyl)benzo[b]thiophene (**3p**)<sup>[3]</sup>

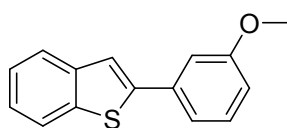

The reaction was conducted with methyl 2-(3-methoxyphenyl)acetate (**1h**, 54.0 mg, 0.3 mmol) and **2a** (37.0 mg, 0.2 mmol) under the standard conditions. After cooling to room temperature, the volatiles were removed under vacuum and the residue was purified by column chromatography (silica gel, PE : EA = 50 : 1) to give **3p** (37.0 mg) as yellow solid in 77% yield.

<sup>1</sup>H NMR (400 MHz, CDCl<sub>3</sub>, ppm) δ 7.82 (d, *J* = 7.6 Hz, 1H), 7.77 (d, *J* = 7.6 Hz, 1H), 7.54 (s, 1H), 7.37-7.25 (m, 5H), 6.89 (d, *J* = 7.2 Hz, 1H), 3.88 (s, 3H); <sup>13</sup>C NMR (100 MHz, CDCl<sub>3</sub>, ppm) δ 160.0, 144.1, 140.6, 139.5, 135.6, 129.9, 124.5, 124.3, 123.6, 122.2, 119.7, 119.1, 113.8, 112.2, 55.3; MS (EI) *m/z* (%) 240 (100), 197, 165, 152, 120.

---

### 2-(3-Fluorophenyl)benzo[b]thiophene (**3q**)<sup>[4]</sup>

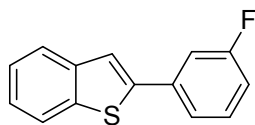

The reaction was conducted with methyl 2-(3-fluorophenyl)acetate (**1i**, 50.4 mg, 0.3 mmol) and **2a** (37.0 mg, 0.2 mmol) under the standard conditions. After cooling to room temperature, the volatiles were removed under vacuum and the residue was purified by column chromatography (silica gel, petroleum ether) to give **3q** (27.8 mg) as white solid in 61% yield.

<sup>1</sup>H NMR (400 MHz, CDCl<sub>3</sub>, ppm) δ 7.83 (d, *J* = 7.6 Hz, 1H), 7.79 (d, *J* = 7.2 Hz, 1H), 7.56 (s, 1H), 7.49 (d, *J* = 8.0 Hz, 1H), 7.43-7.32 (m, 4H), 7.04 (d, *J* = 8.0 Hz, 1H); <sup>13</sup>C NMR (100 MHz, CDCl<sub>3</sub>, ppm) δ 163.1 (d, *J* = 245 Hz), 142.6 (d, *J* = 2.4 Hz), 140.4, 139.5, 136.4 (d, *J* = 7.9 Hz), 130.4 (d, *J* = 8.5 Hz), 124.7, 124.6, 123.8, 122.3, 122.1 (d, *J* = 2.8 Hz), 120.3, 115.0 (d, *J* = 21.1 Hz), 113.2 (d, *J* = 22.7 Hz); MS (EI) *m/z* (%) 232, 123, 109 (100), 83, 77. MS (EI) *m/z* (%) 228 (100), 207, 196, 183, 114.

### 2-(2-Chlorophenyl)benzo[b]thiophene (**3r**, CAS: 936734-94-0)<sup>[5]</sup>

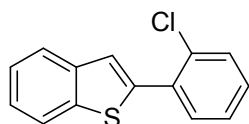

The reaction was conducted with methyl 2-(2-chlorophenyl)acetate (**1j**, 55.2 mg, 0.3 mmol) and **2a** (37.0 mg, 0.2 mmol) under the standard conditions. After cooling to room temperature, the volatiles were removed under vacuum and the residue was purified by column chromatography (silica gel, petroleum ether) to give **3r** (35.6 mg) as yellow solid in 73% yield.

<sup>1</sup>H NMR (400 MHz, CDCl<sub>3</sub>, ppm) δ 7.87-7.81 (m, 2H), 7.61-7.59 (m, 1H), 7.58 (s, 1H), 7.51 (d, *J* = 8.0 Hz, 1H), 7.40-7.28 (m, 4H); <sup>13</sup>C NMR (100 MHz, CDCl<sub>3</sub>, ppm) δ 140.3, 140.2, 139.9, 133.2, 132.8, 131.9, 130.6, 129.2, 126.9, 124.53, 124.46, 124.43, 123.9, 122.0; MS (EI) *m/z* (%) 244 (100), 208, 165, 122, 104.

### 2-(2,3-Dichlorophenyl)benzo[b]thiophene (3s)

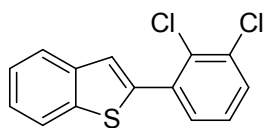

The reaction was conducted with methyl 2-(2,3-dichlorophenyl)acetate (**1k** 65.7 mg, 0.3 mmol) and **2a** (37.0 mg, 0.2 mmol) under the standard conditions. After cooling to room temperature, the volatiles were removed under vacuum and the residue was purified by column chromatography (silica gel, petroleum ether) to give **3s** (45.8 mg) as yellow solid in 82% yield.

$^1\text{H}$  NMR (400 MHz,  $\text{CDCl}_3$ , ppm)  $\delta$  7.86-7.82 (m, 1H), 7.71-7.69 (m, 1H), 7.50-7.41 (m, 5H), 7.30-7.28 (m, 1H);  $^{13}\text{C}$  NMR (100 MHz,  $\text{CDCl}_3$ , ppm)  $\delta$  138.7, 134.6, 133.7, 130.5, 128.7, 128.6, 128.0, 126.4, 126.3, 125.9, 125.5, 125.0, 121.4, 120.0; HRMS (ESI) calcd. for:  $\text{C}_{14}\text{H}_9\text{Cl}_2\text{S}$   $[\text{M}+\text{H}]^+$  278.97965, found 278.97809.

### 2-(2,4-Dichlorophenyl)benzo[b]thiophene (3t)

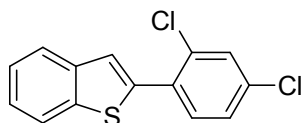

The reaction was conducted with methyl 2-(2,4-dichlorophenyl)acetate (**1l** 65.7 mg, 0.3 mmol) and **2a** (37.0 mg, 0.2 mmol) under the standard conditions. After cooling to room temperature, the volatiles were removed under vacuum and the residue was purified by column chromatography (silica gel, petroleum ether) to give **3t** (44.1 mg) as yellow solid in 79% yield.

$^1\text{H}$  NMR (400 MHz,  $\text{CDCl}_3$ , ppm)  $\delta$  7.86-7.81 (m, 2H), 7.56-7.52 (m, 3H), 7.43-7.30 (m, 3H);  $^{13}\text{C}$  NMR (100 MHz,  $\text{CDCl}_3$ , ppm)  $\delta$  140.2, 139.8, 139.1, 134.5, 133.5, 132.5, 131.9, 130.4, 127.3, 124.8, 124.7, 124.6, 123.9, 122.0; HRMS (ESI) calcd. for:  $\text{C}_{14}\text{H}_9\text{Cl}_2\text{S}$   $[\text{M}+\text{H}]^+$  278.97965, found 278.97947.

### 2-(Naphthalen-2-yl)benzo[b]thiophene (3u, CAS: 17164-77-1)<sup>[2]</sup>

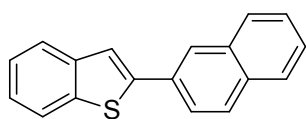

The reaction was conducted with methyl 2-(naphthalen-2-yl)acetate (**1m** 60.0 mg, 0.3 mmol) and

---

**2a** (37.0 mg, 0.2 mmol) under the standard conditions. After cooling to room temperature, the volatiles were removed under vacuum and the residue was purified by column chromatography (silica gel, petroleum ether) to give **3u** (32.8 mg) as white solid in 63% yield.

<sup>1</sup>H NMR (400 MHz, CDCl<sub>3</sub>, ppm) δ 8.15 (s, 1H), 7.91-7.84 (m, 5H), 7.81 (d, *J* = 7.6 Hz, 1H), 7.68 (s, 1H), 7.52-7.49 (m, 2H), 7.35 (t, *J* = 8.4 Hz, 2H); <sup>13</sup>C NMR (100 MHz, CDCl<sub>3</sub>, ppm) δ 144.3, 140.8, 139.6, 133.6, 133.1, 131.7, 128.6, 128.2, 127.7, 126.7, 126.4, 125.4, 124.6, 124.43, 124.36, 123.6, 122.3, 119.9; MS (EI) *m/z* (%) 260 (100), 133, 127, 115, 77.

### 3-(Benzo[b]thiophen-2-yl)pyridine (**3v**)<sup>[6]</sup>

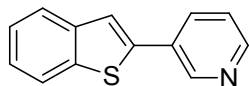

The reaction was conducted with methyl 2-(pyridin-3-yl)acetate (**1n** 45.3 mg, 0.3 mmol) and **2a** (37.0 mg, 0.2 mmol) under the standard conditions. After cooling to room temperature, the volatiles were removed under vacuum and the residue was purified by column chromatography (silica gel, PE : EA = 4 : 1) to give **3v** (35.9 mg) as yellow solid in 85% yield.

<sup>1</sup>H NMR (400 MHz, CDCl<sub>3</sub>, ppm) δ 8.99 (s, 1H), 8.57 (d, *J* = 4.0 Hz 1H), 7.97 (d, *J* = 7.6 Hz, 1H), 7.85 (d, *J* = 7.2 Hz 1H), 7.81 (s, *J* = 8.0 Hz 1H), 7.60 (s, 1H), 7.40-7.33 (m, 3H); <sup>13</sup>C NMR (100 MHz, CDCl<sub>3</sub>, ppm) δ 149.0, 147.3, 140.4, 140.1, 139.7, 133.6, 130.4, 124.9, 124.8, 123.8, 123.7, 122.3, 120.8; MS (EI) *m/z* (%) 221 (100), 179, 167, 139, 79.

### 2,2'-Dithiodibenzaldehyde (**A**, CAS: 55164-16-4)<sup>[7]</sup>

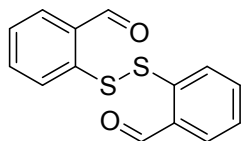

<sup>1</sup>H NMR (400 MHz, CDCl<sub>3</sub>, ppm) δ 10.22 (s, 2H), 7.88 (d, *J* = 7.6 Hz, 2H), 7.78 (d, *J* = 8.4 Hz, 2H), 7.50 (t, *J* = 7.6 Hz, 2H), 7.39 (t, *J* = 7.6 Hz, 2H); MS (EI) *m/z* (%) 274, 137(100), 109, 76, 65.

## D. References

- 
- [1] P. H. Durga, H. Thea, K. Burkhard, *Org. Lett.*, 2012, **14**, 5334–5337.
- [2] H. Yu, M. Zhang, Y. Li, *J. Org. Chem.*, 2013, **78**, 8898–8903.
- [3] B. Liégault, D. Lapointe, L. Caron, A. Vlassova, K. Fagnou, *J. Org. Chem.*, 2009, **74**, 1826–1834.
- [4] V. Guilarte, M. A. Fernández-Rodríguez, P. García-García, E. Hernando, R. Sanz, *Org. Lett.*, 2011, **13**, 5100–5103.
- [5] T. Truong, M. Mesgar, K. K. A. Le, O. Daugulis, *J. Am. Chem. Soc.*, 2014, **136**, 8568–8576.
- [6] S. Ge, J. F. Hartwig, *Angew. Chem. Int. Ed.*, 2012, **51**, 12837–12841.
- [7] M. Raj, H. Wu, S. L. Blosser, M. A. Vittoria, P. S. Arora, *J. Am. Chem. Soc.*, 2015, **137**, 6932–6940.

## E. Copies of $^1\text{H}$ and $^{13}\text{C}$ NMR spectra of the products

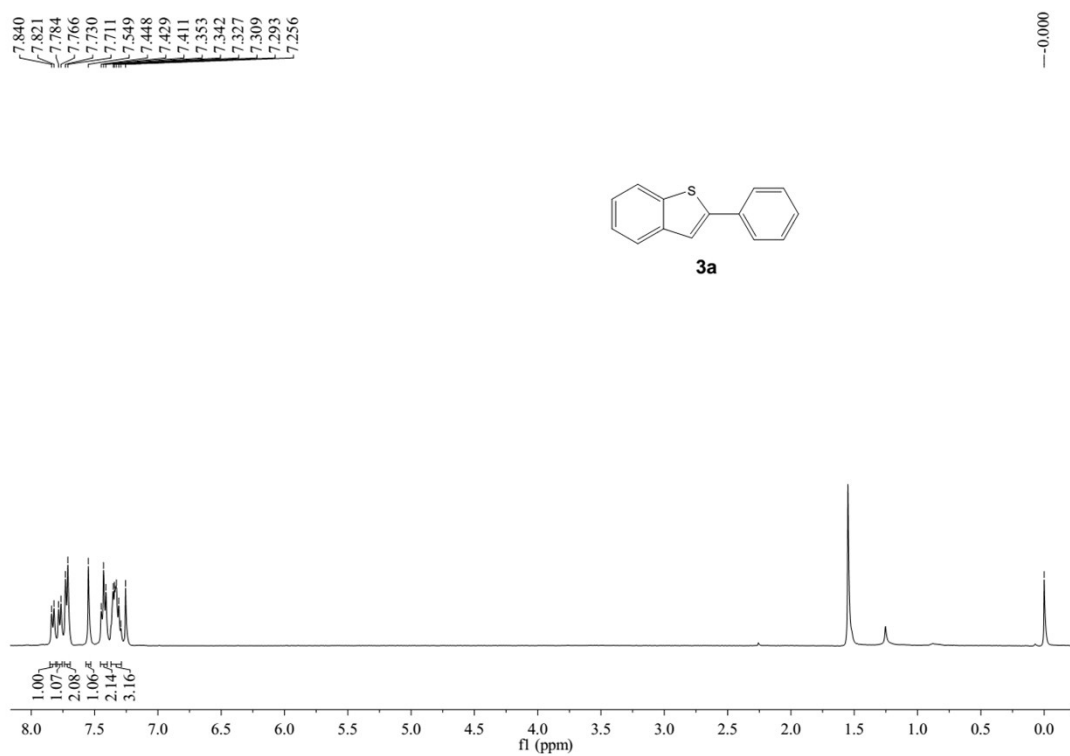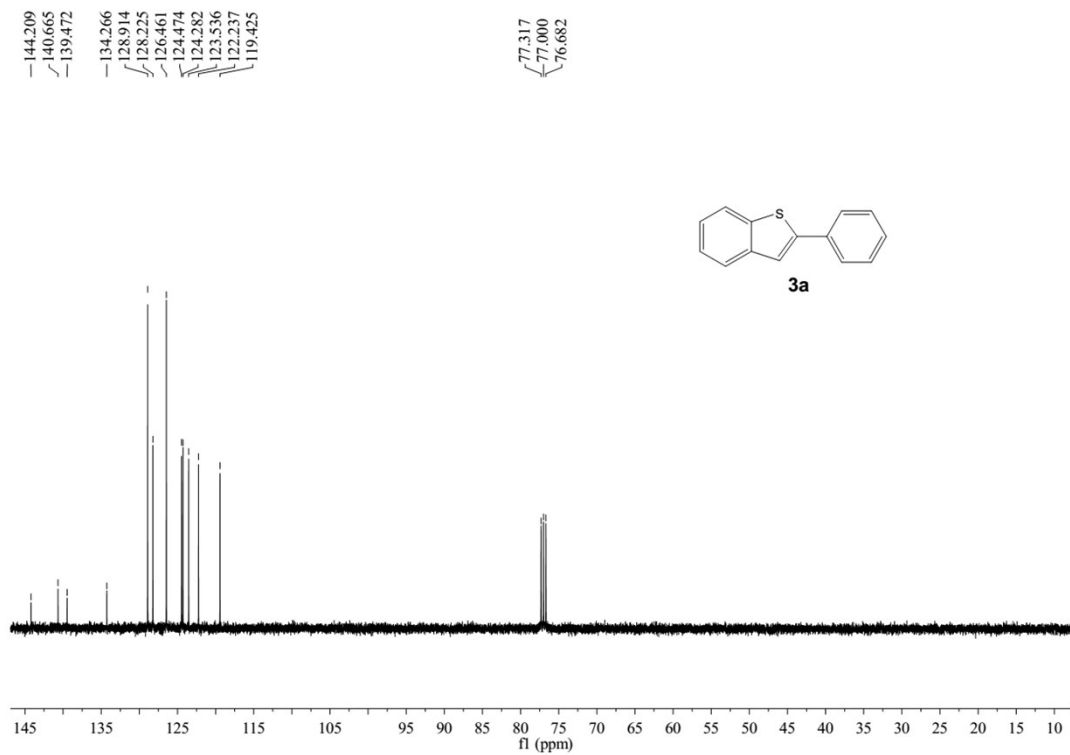

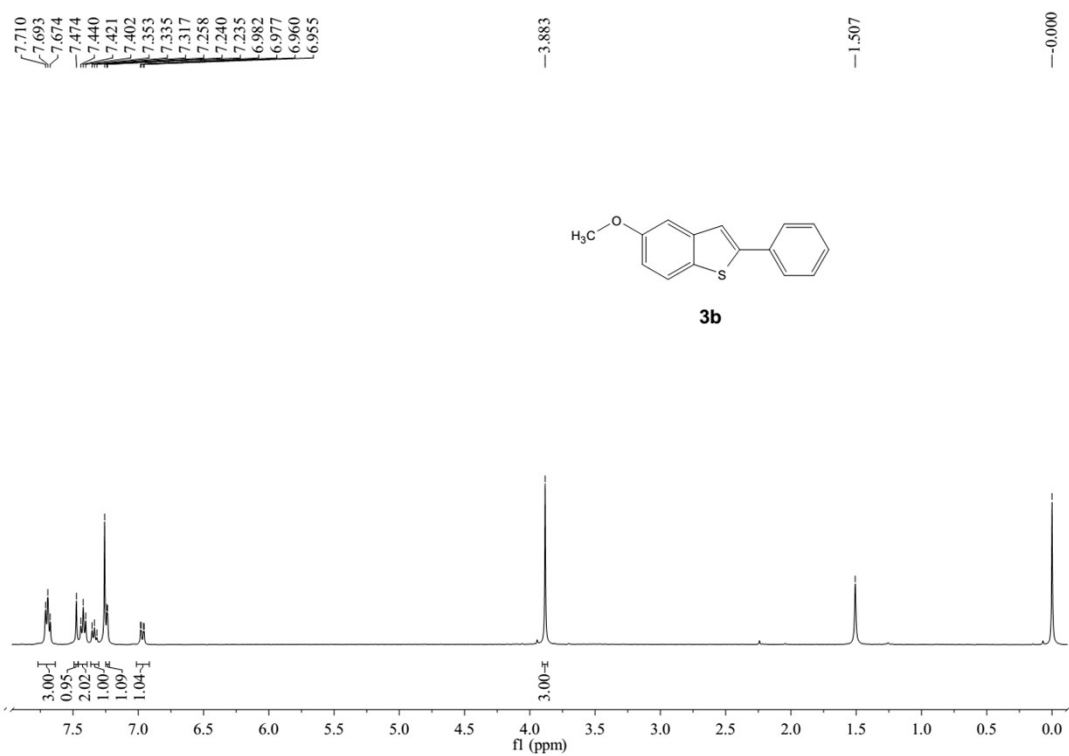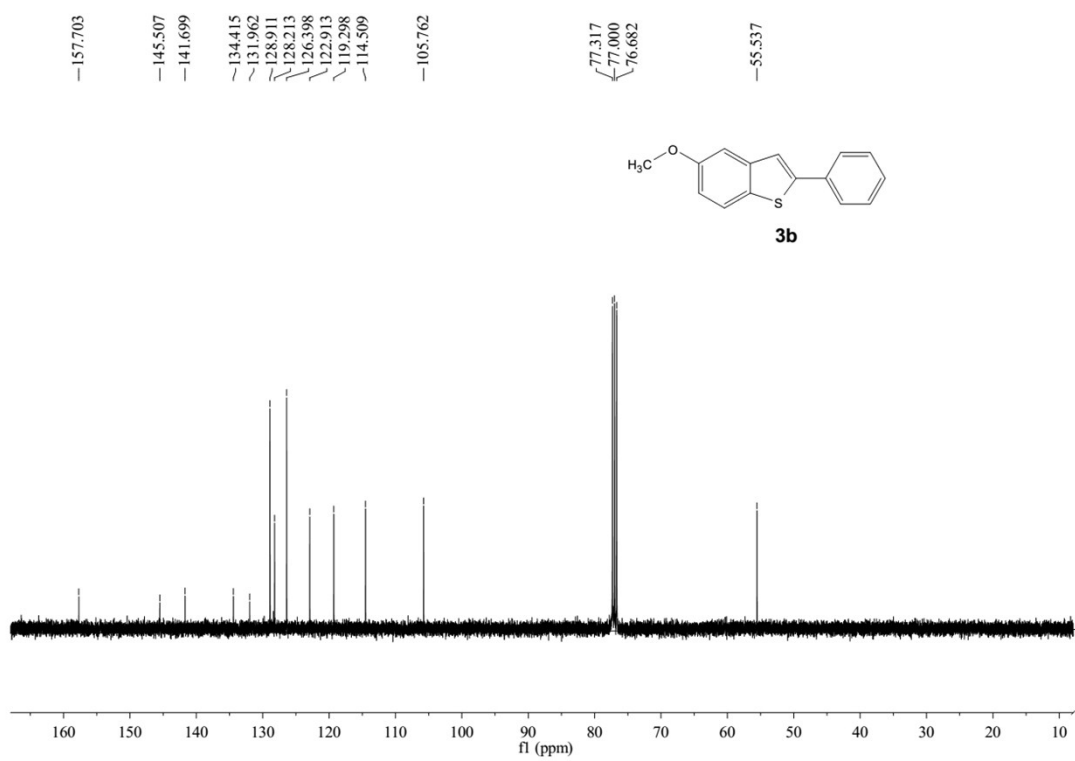

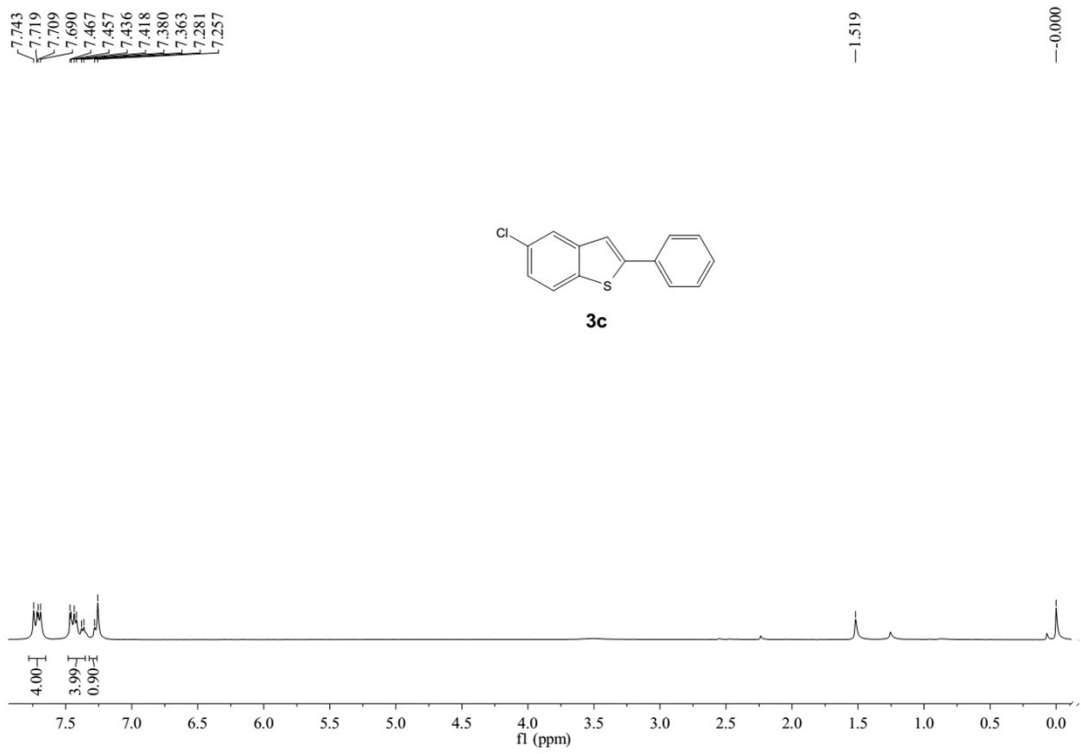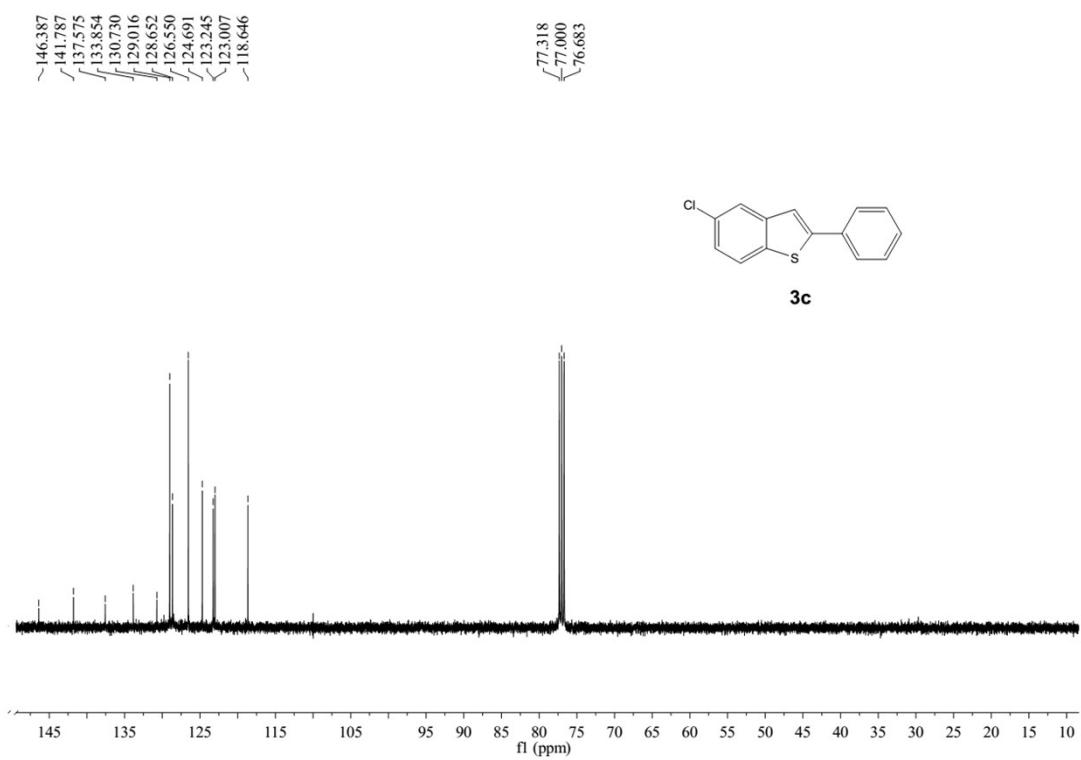



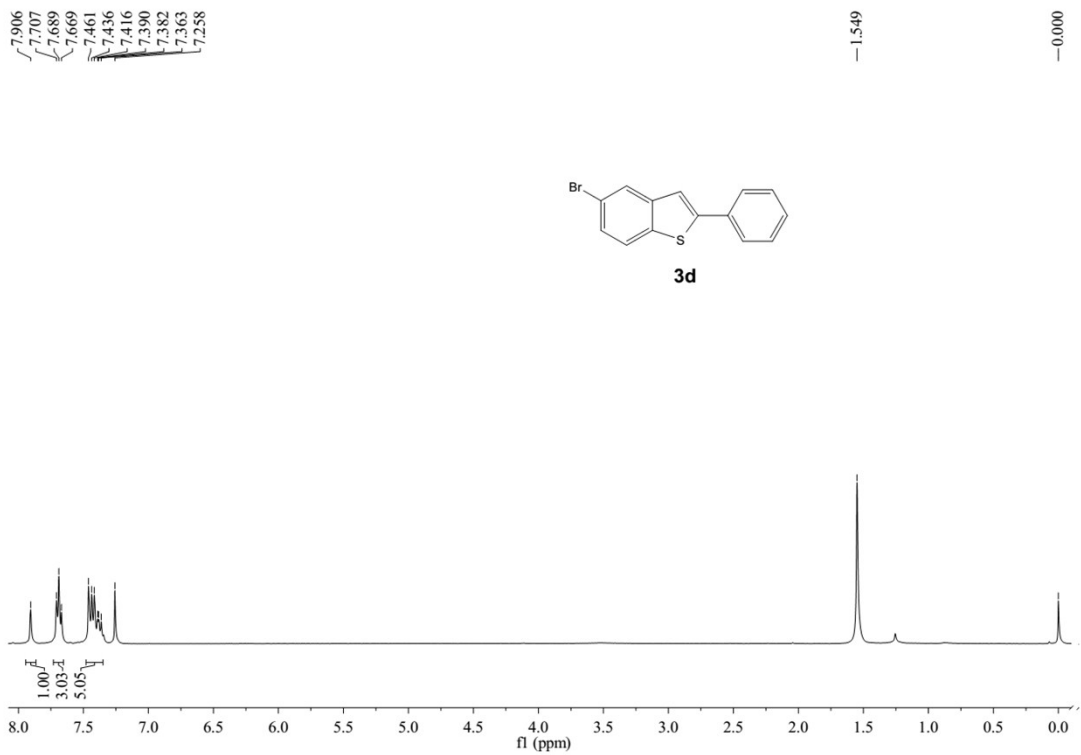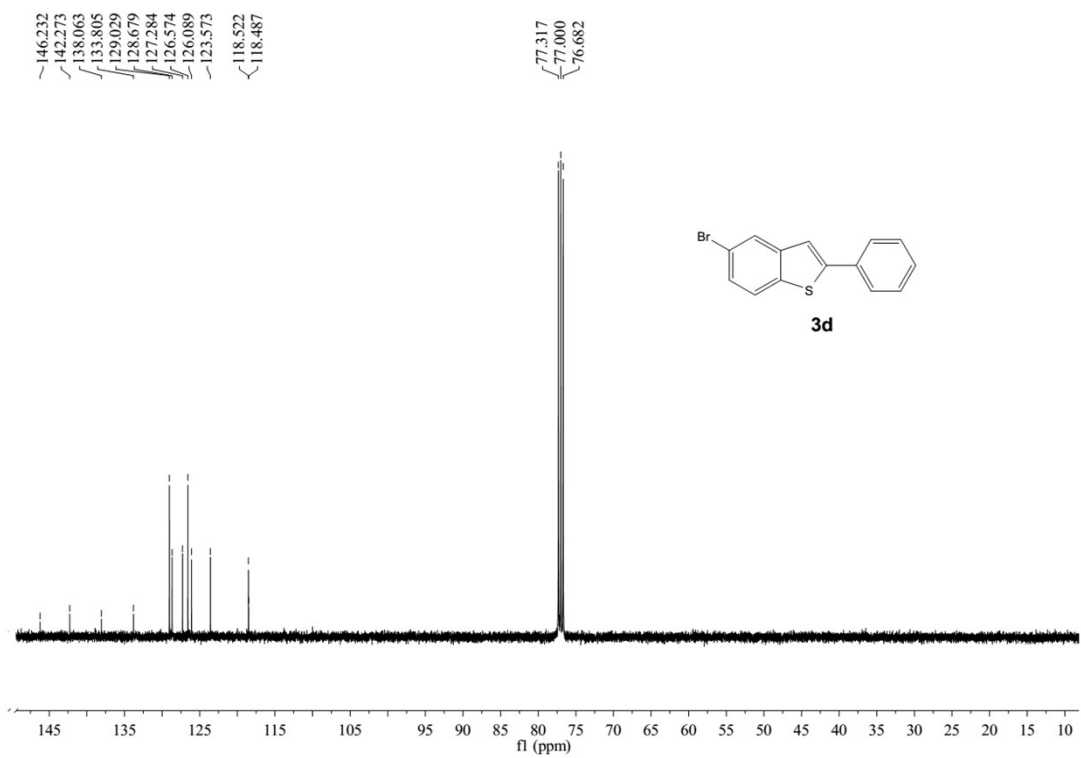

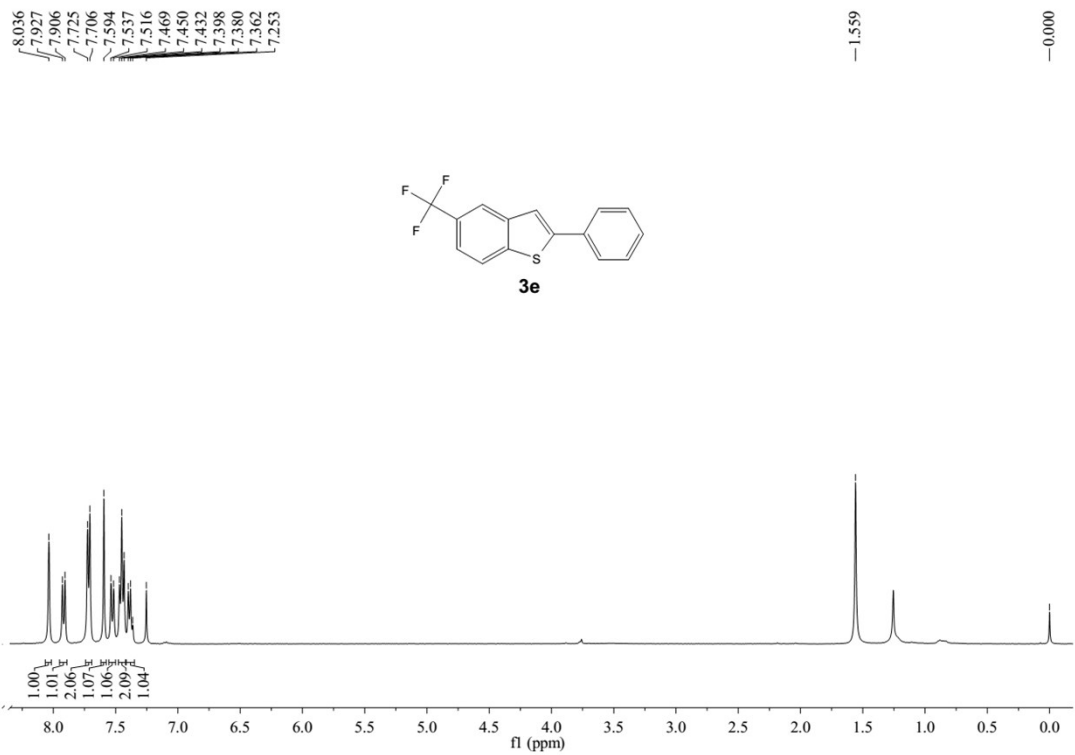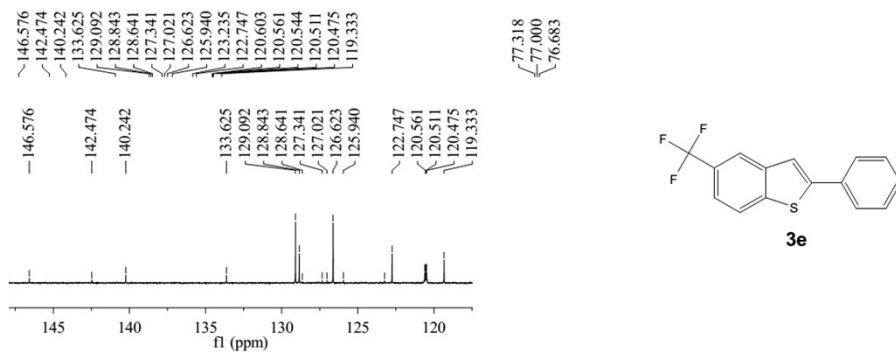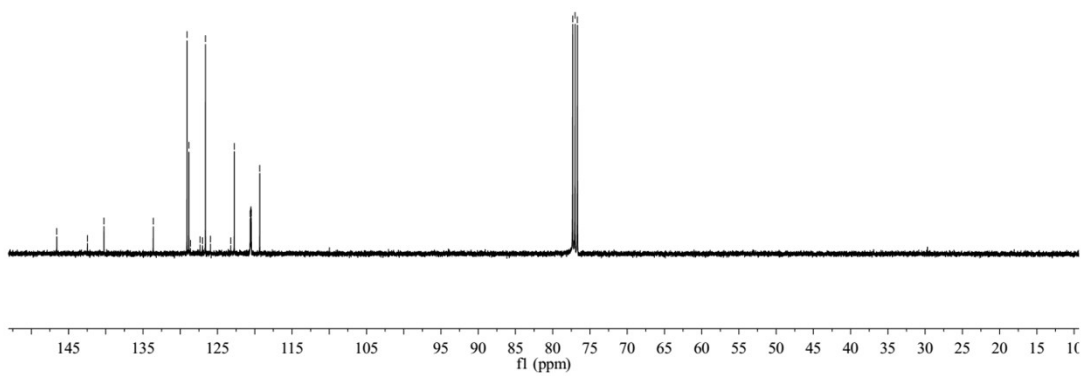

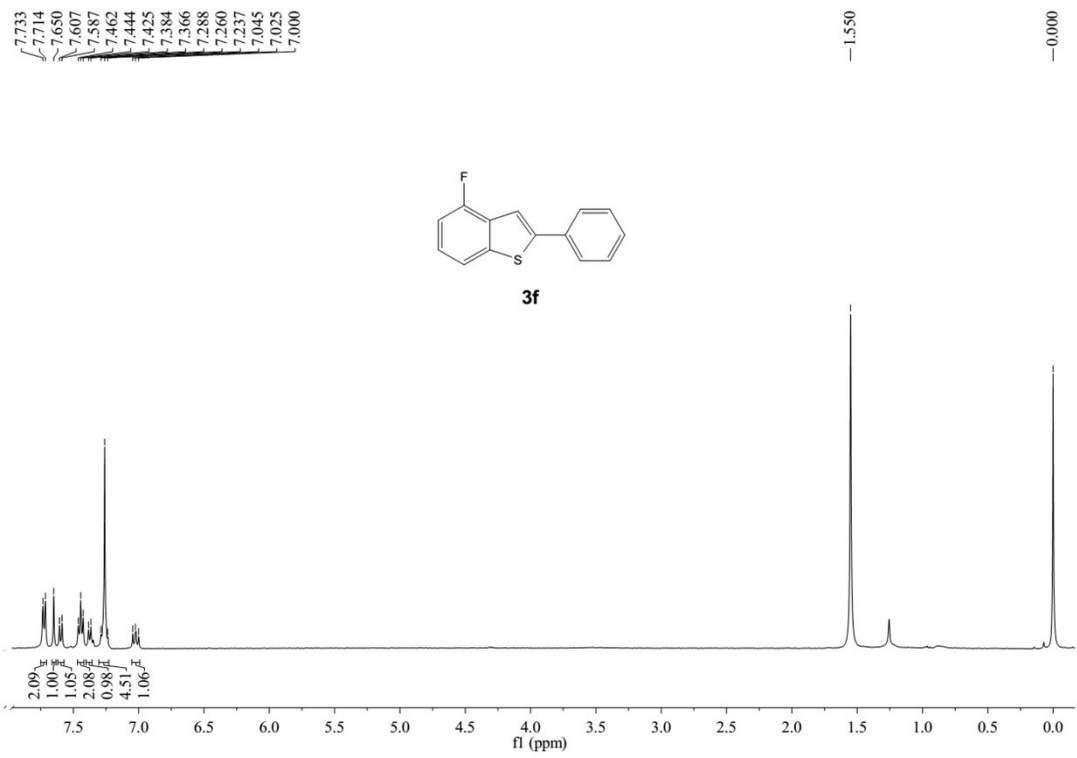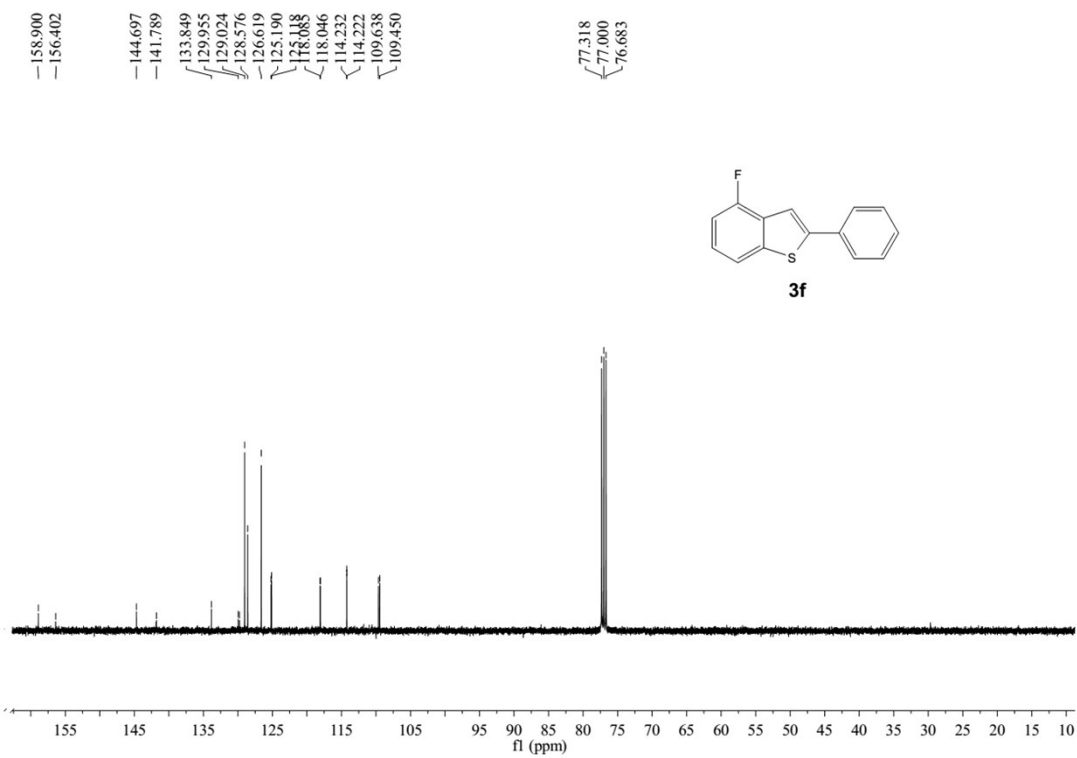

7.729  
7.710  
7.561  
7.550  
7.460  
7.442  
7.423  
7.385  
7.367  
7.349  
7.334  
7.314  
7.301  
7.282  
7.255  
7.035  
7.012  
6.990

1.547

0.000

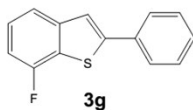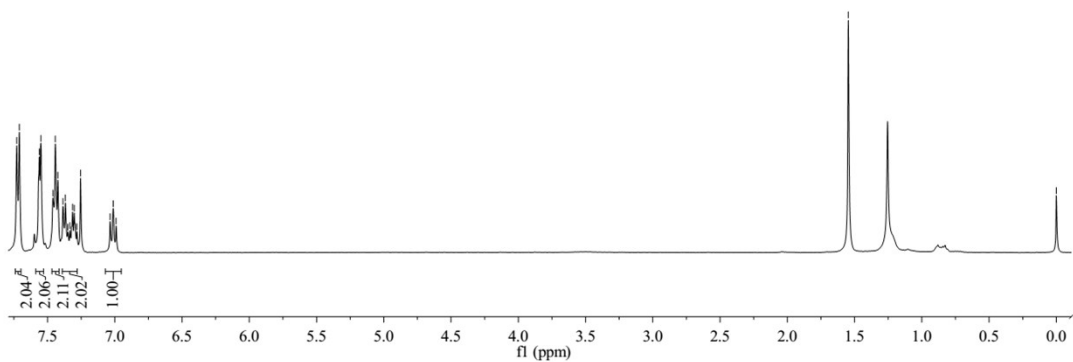

158.757  
156.306  
145.565  
144.972  
133.800  
129.041  
128.652  
126.586  
125.878  
125.811  
122.753  
119.556  
119.534  
119.327  
119.294  
109.513  
109.329

77.318  
77.000  
76.683

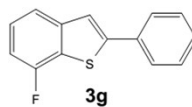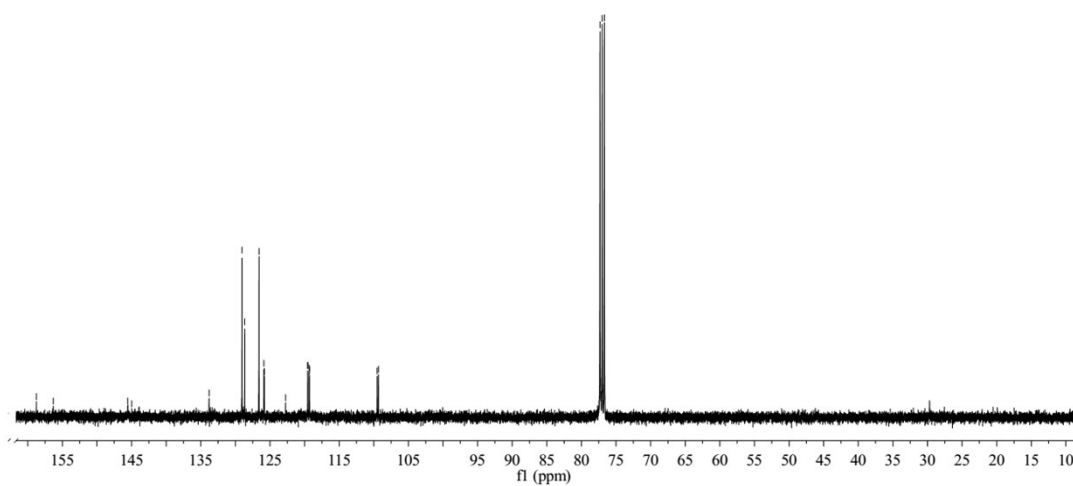

7.746  
7.726  
7.707  
7.461  
7.443  
7.424  
7.386  
7.367  
7.360  
7.340  
7.255  
7.232  
7.212

1.536

0.000

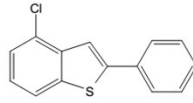

3h

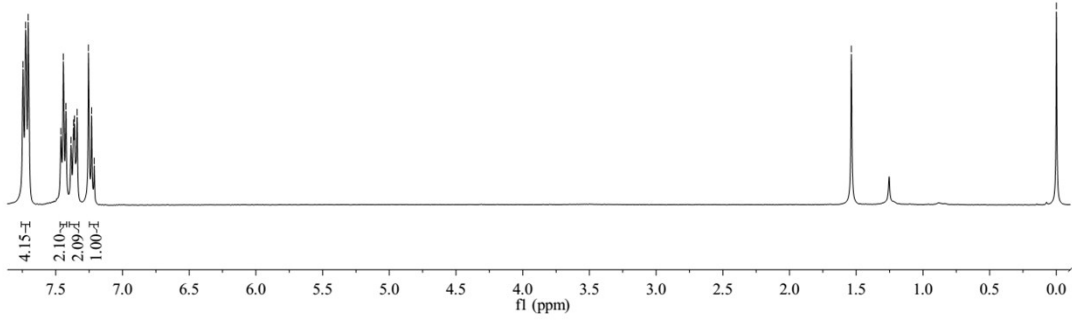

145.278  
140.471  
138.908  
133.768  
129.003  
128.654  
128.459  
126.573  
124.875  
124.470  
120.733  
117.615

77.317  
77.000  
76.682

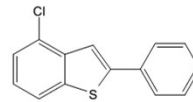

3h

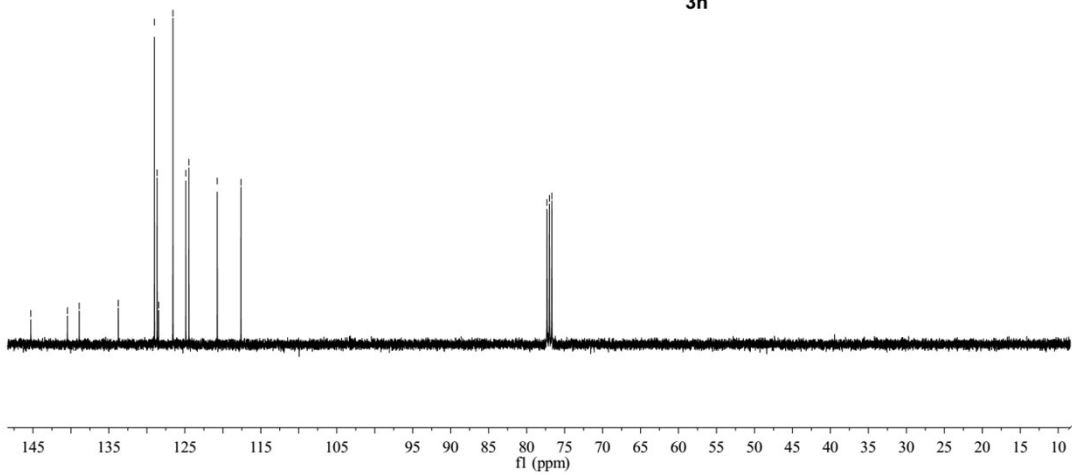

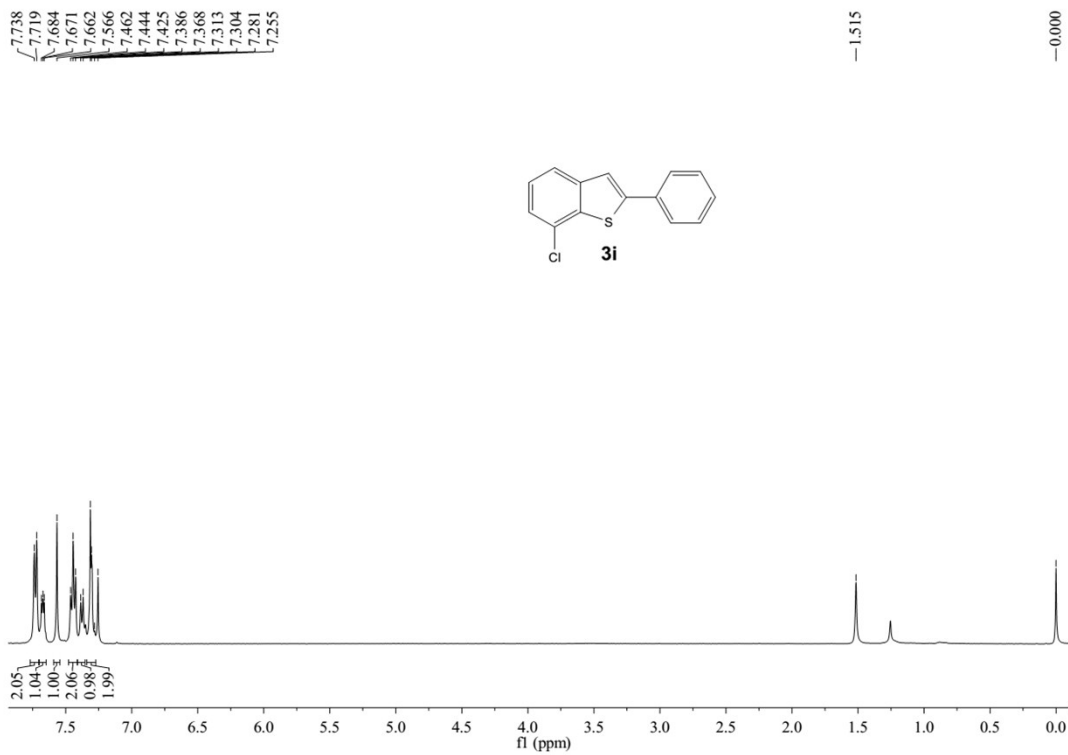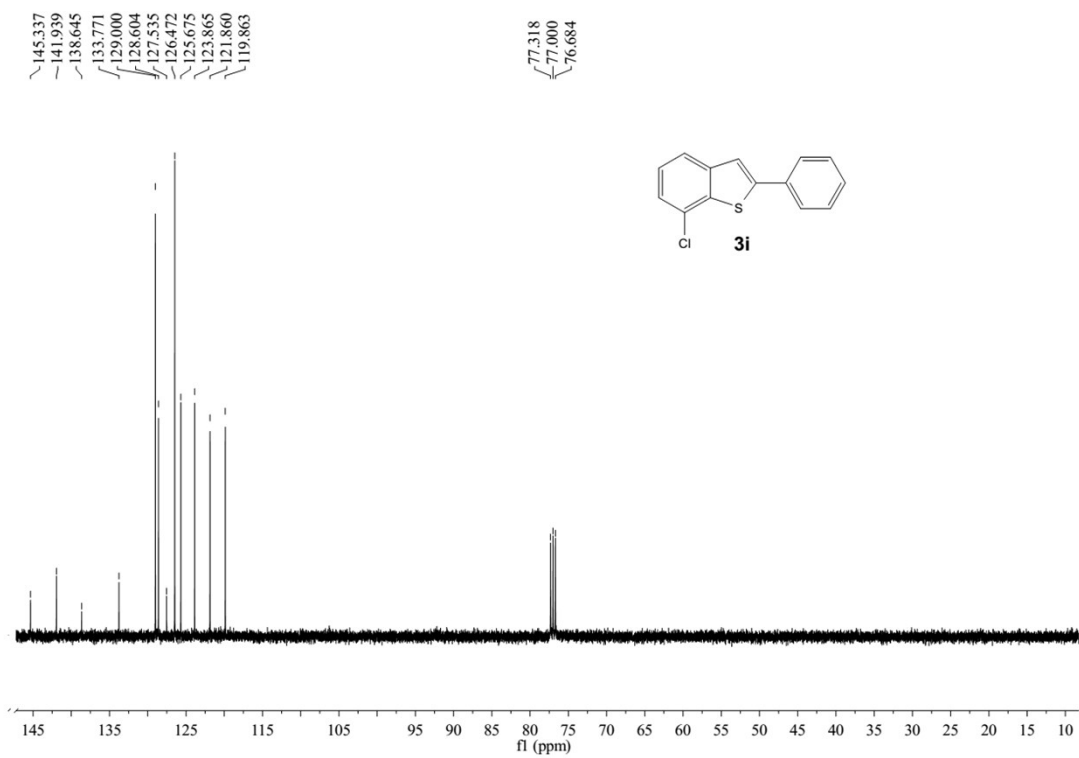

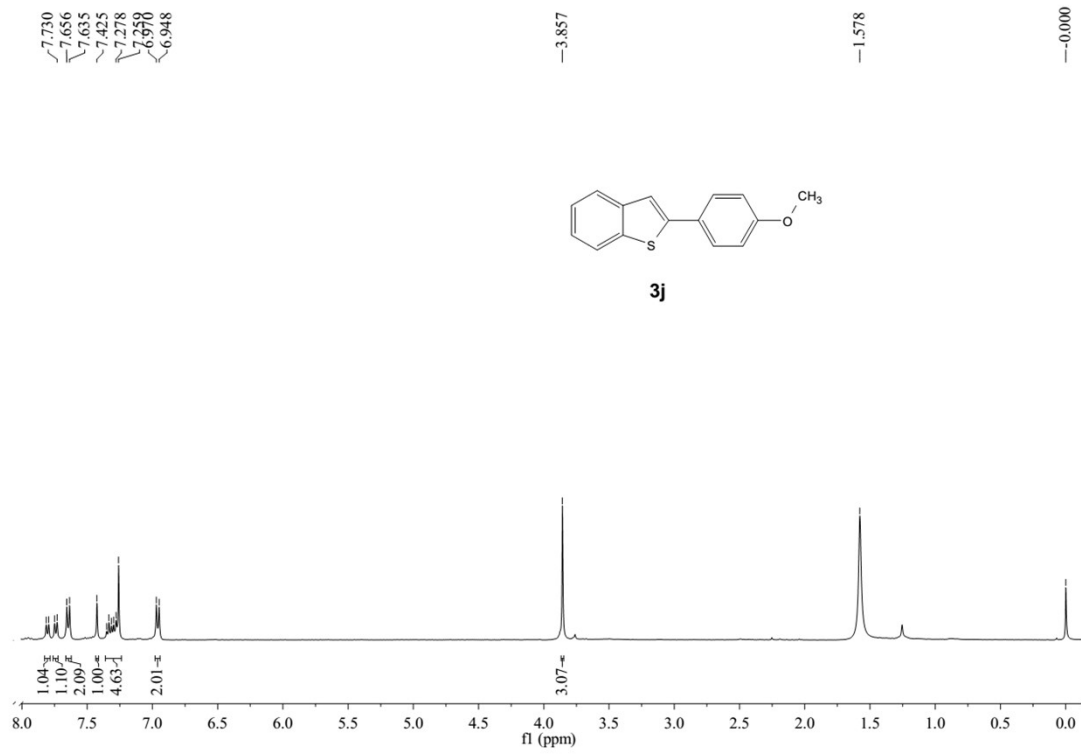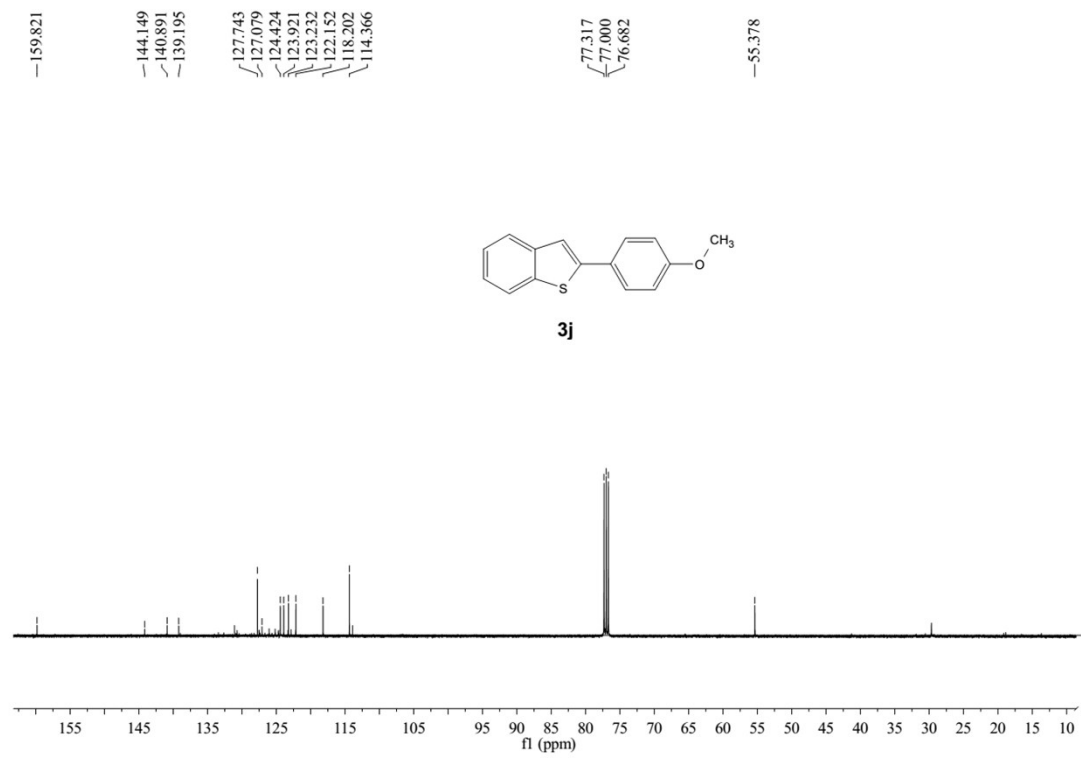

7.829  
7.810  
7.773  
7.754  
7.690  
7.677  
7.669  
7.656  
7.463  
7.370  
7.354  
7.331  
7.310  
7.292  
7.252  
7.138  
7.117  
7.095

0.000

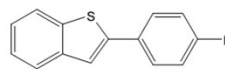

**3k**

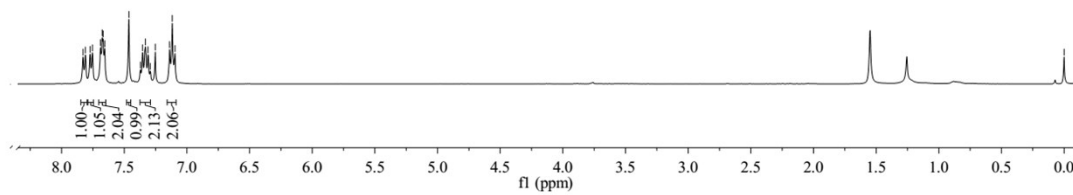

164.019  
161.550  
143.071  
140.674  
139.458  
130.615  
130.581  
128.228  
128.147  
124.604  
124.373  
123.540  
122.240  
119.454  
119.440  
116.053  
115.836

77.318  
77.000  
76.683

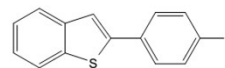

**3k**

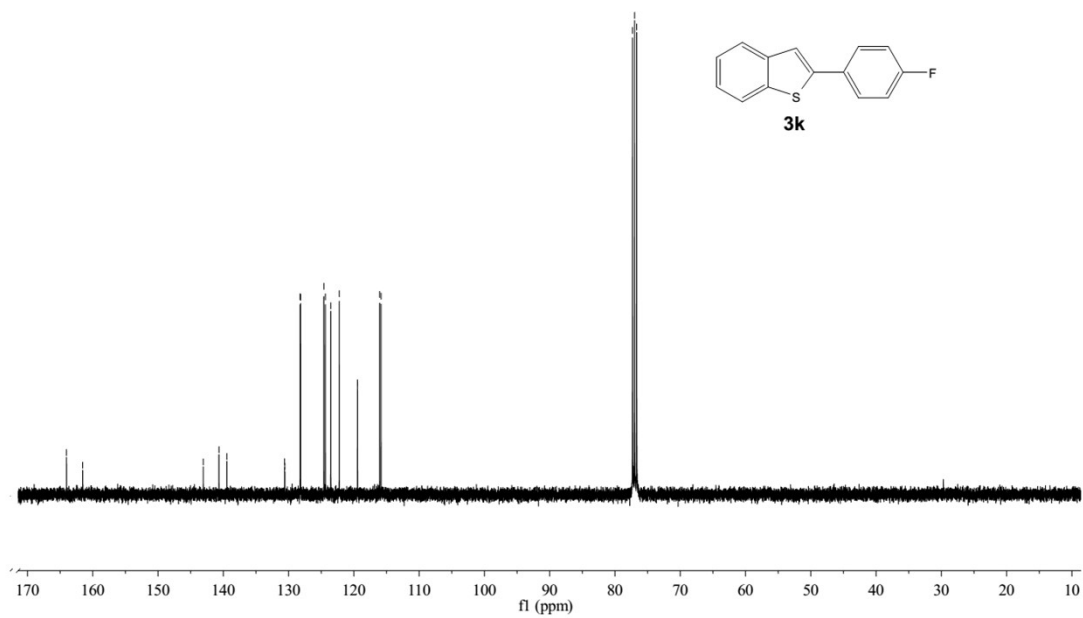



7.828  
7.809  
7.773  
7.754  
7.638  
7.618  
7.510  
7.396  
7.375  
7.355  
7.335  
7.315  
7.298  
7.249

-0.000

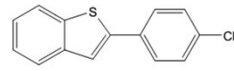

3I

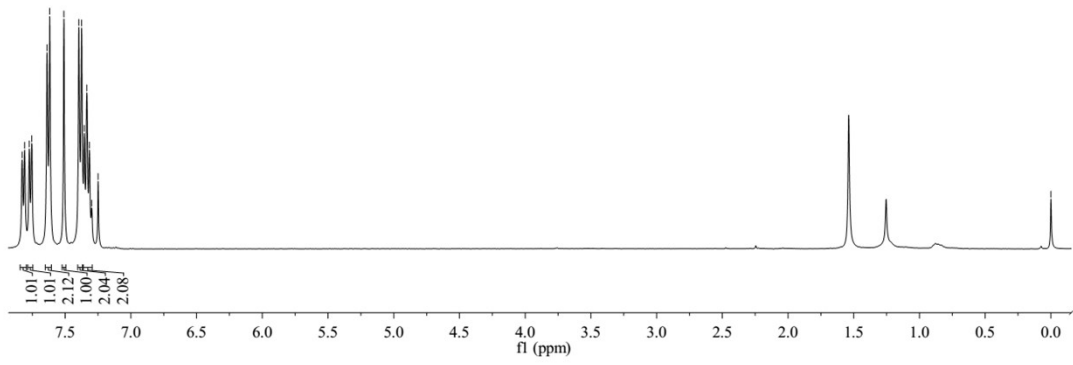

142.835  
140.591  
139.525  
134.104  
132.859  
129.109  
127.641  
124.654  
123.648  
122.266  
119.880

77.318  
77.000  
76.683

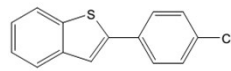

3I

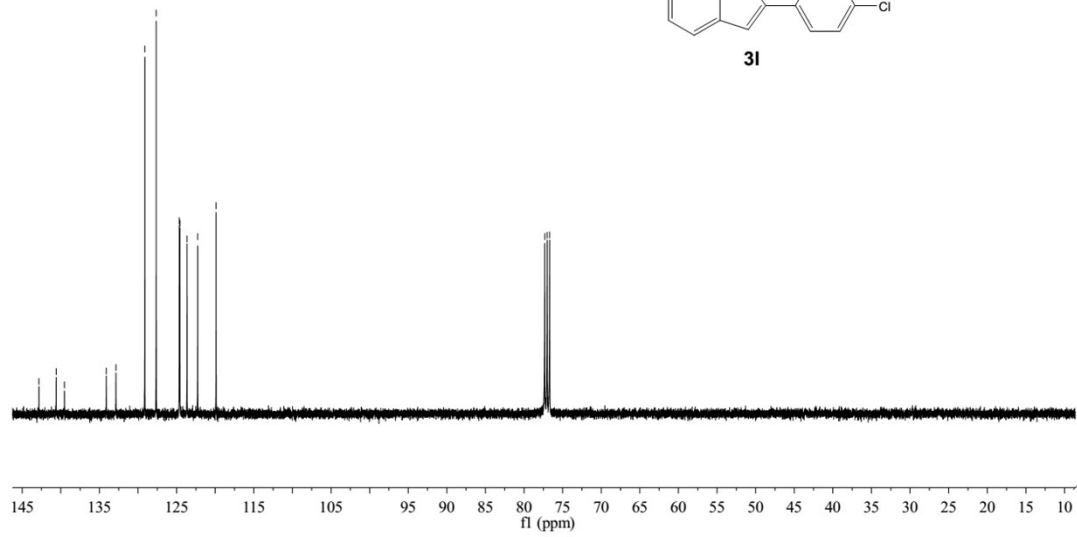

7.832  
7.813  
7.778  
7.760  
7.586  
7.564  
7.554  
7.529  
7.375  
7.357  
7.342  
7.338  
7.323  
7.305  
7.254

-0.000

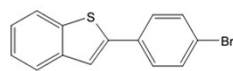

**3m**

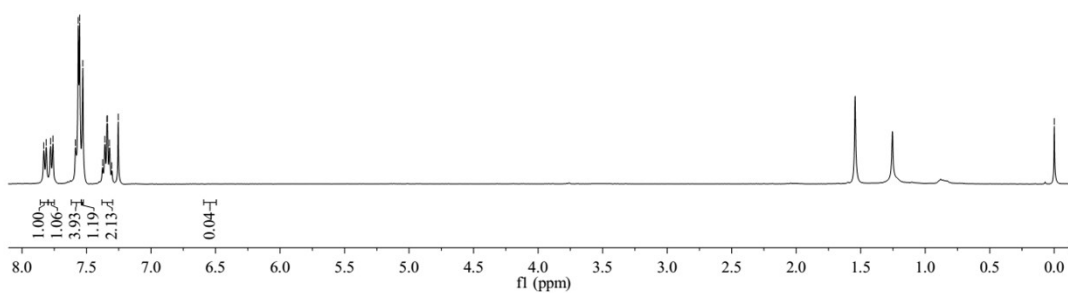

142.863  
140.593  
139.532  
133.318  
132.071  
127.929  
124.678  
123.671  
122.286  
122.233  
119.938

77.319  
77.000  
76.684

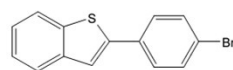

**3m**

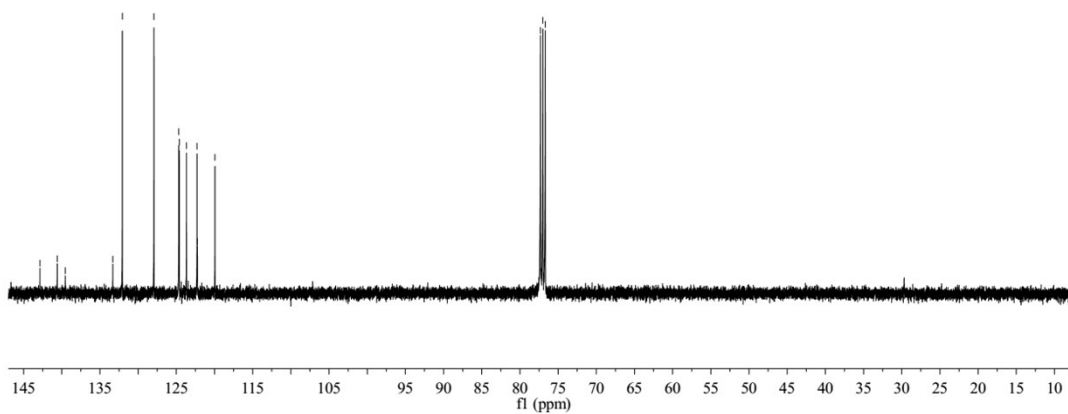

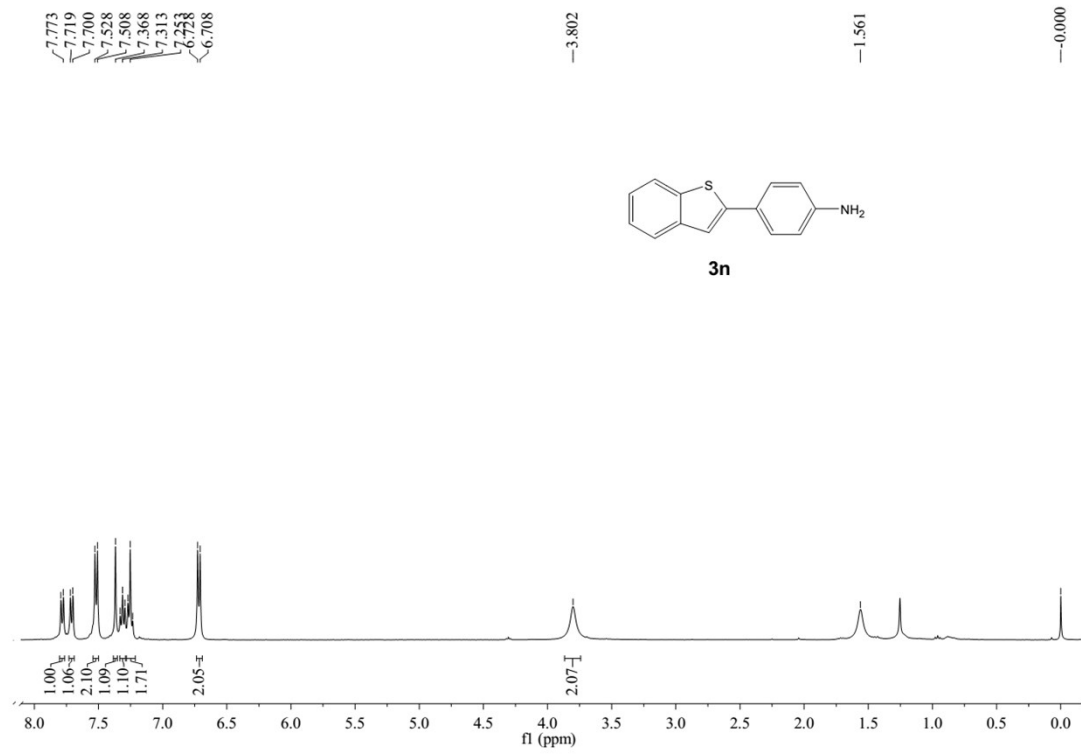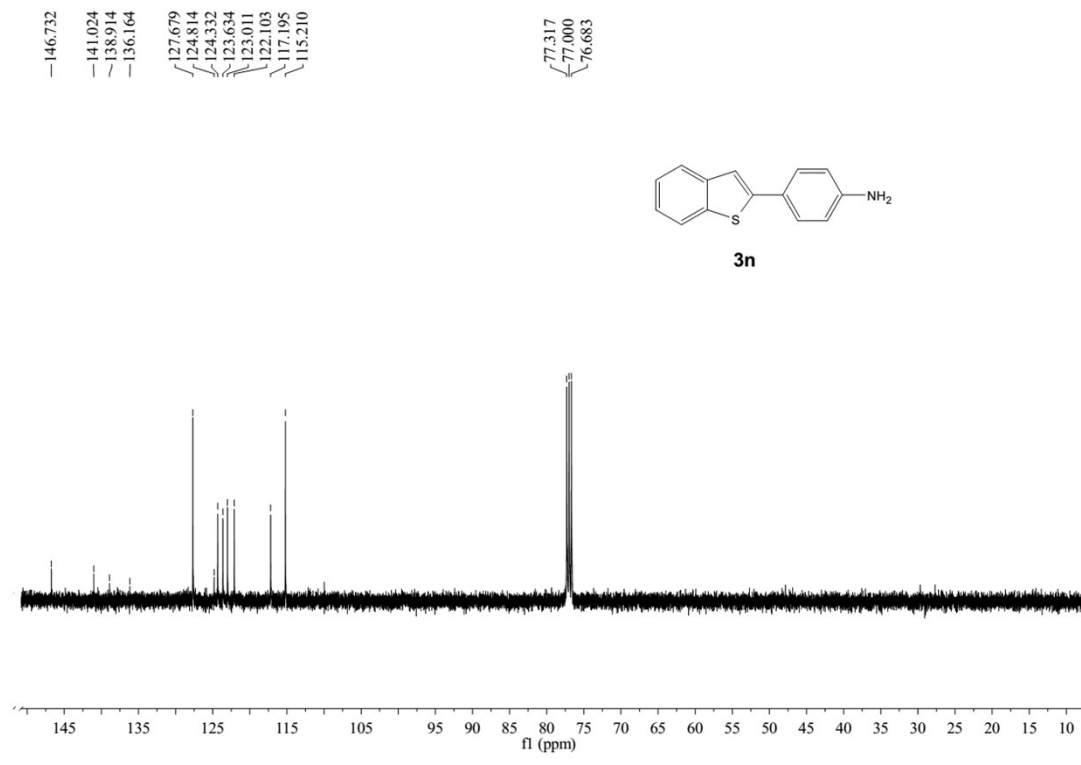

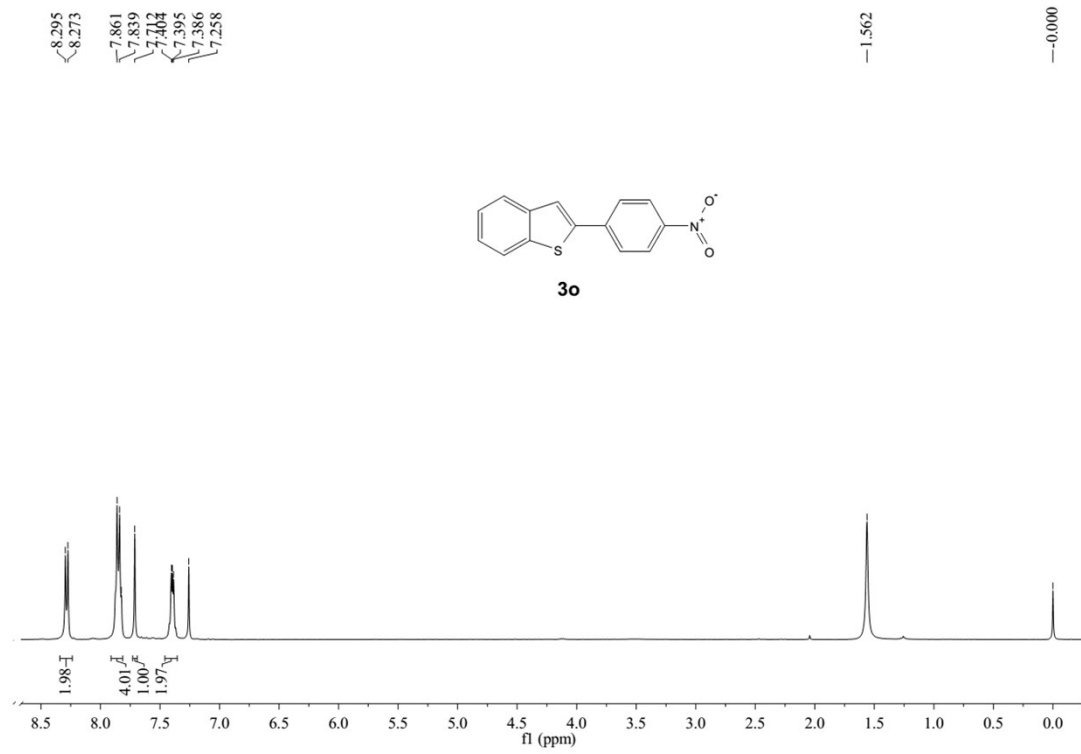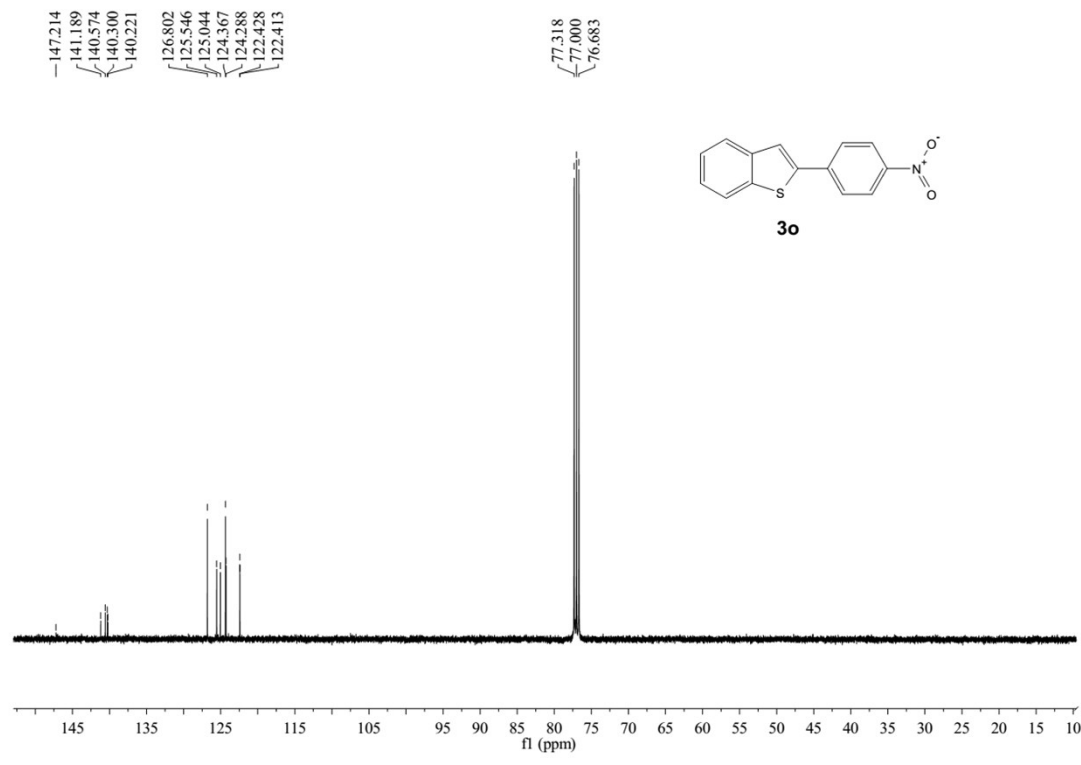

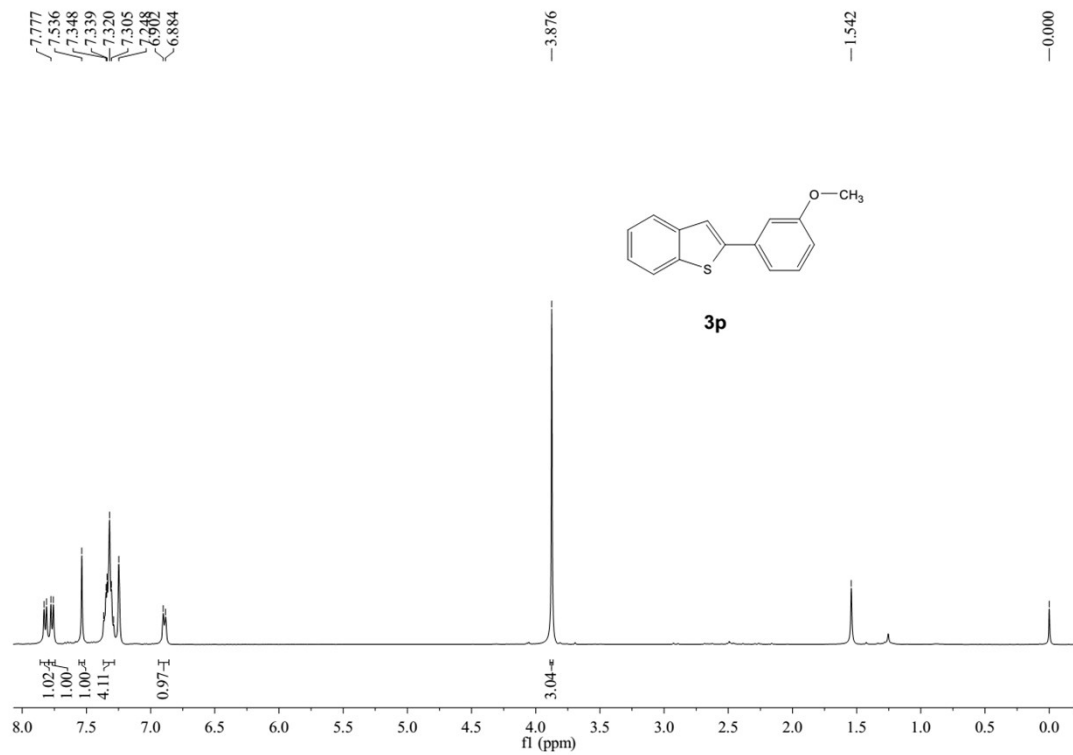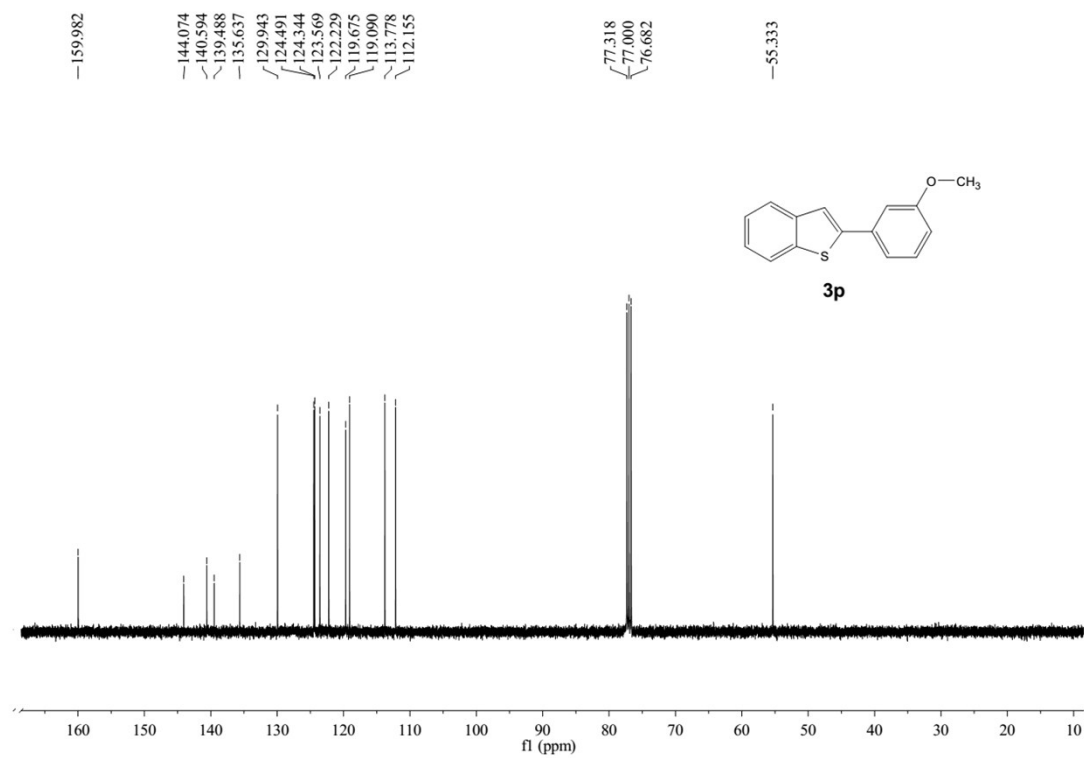

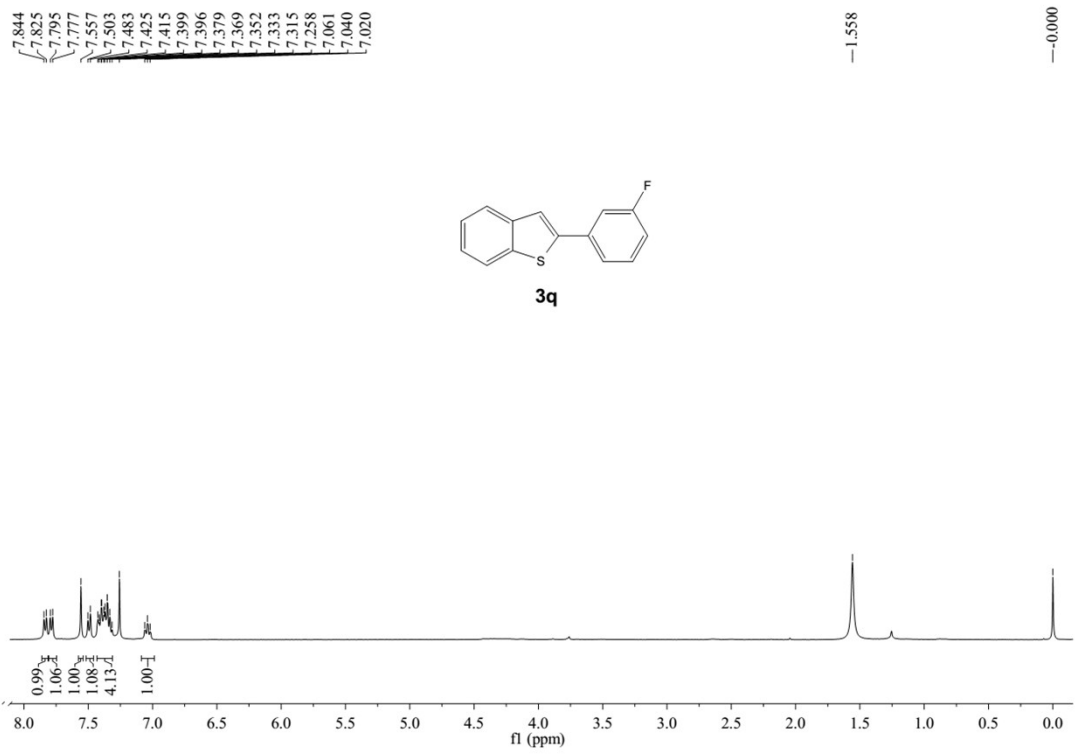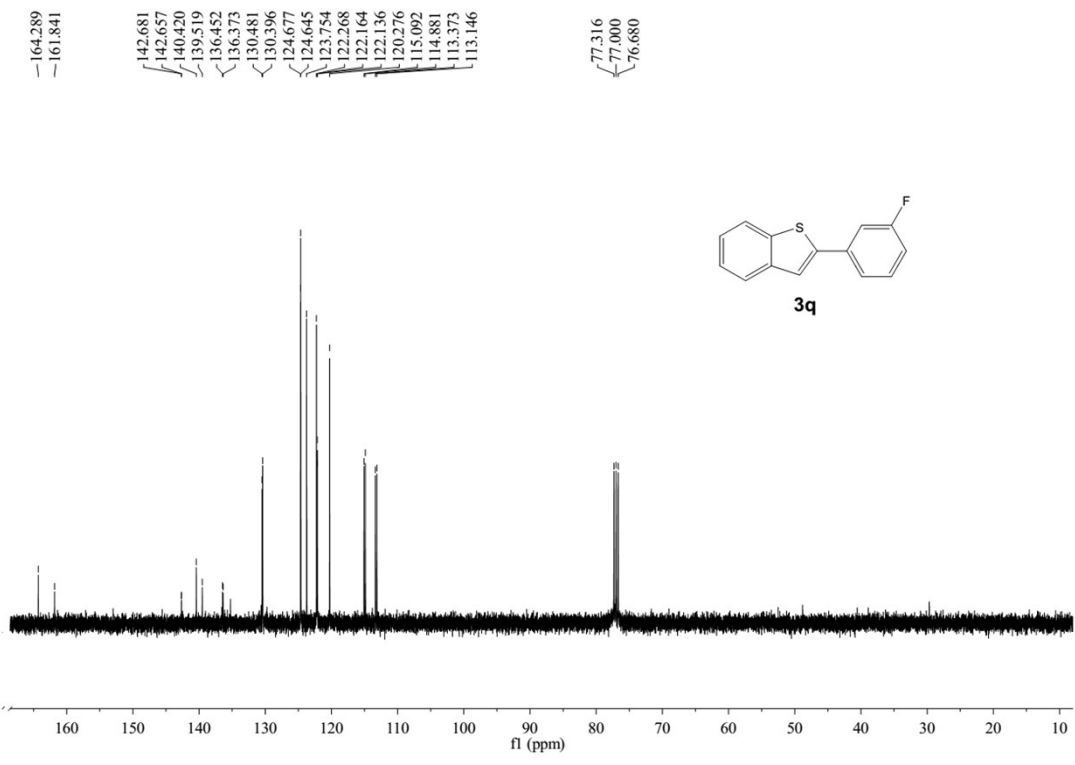

7.865  
7.846  
7.829  
7.811  
7.610  
7.606  
7.587  
7.579  
7.519  
7.499  
7.398  
7.380  
7.362  
7.347  
7.329  
7.315  
7.302  
7.283  
7.256

-1.507

-0.000

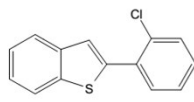

**3r**

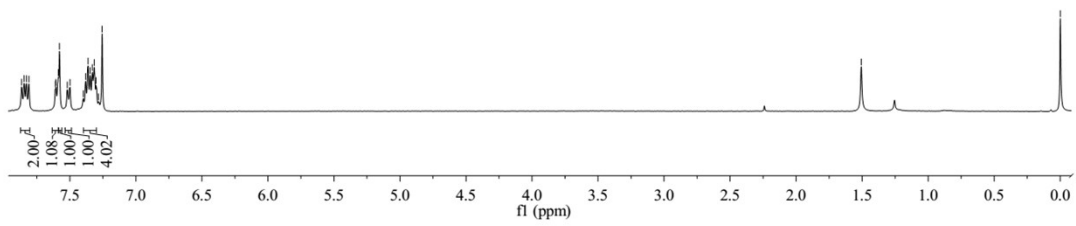

140.277  
140.155  
139.860  
133.208  
132.797  
131.879  
130.560  
129.230  
126.939  
124.531  
124.459  
124.425  
123.861  
122.016

77.317  
77.000  
76.681

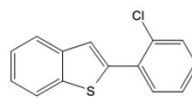

**3r**

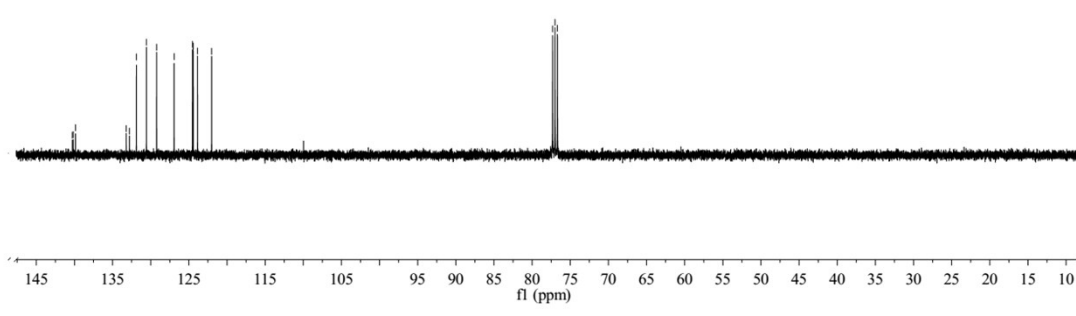

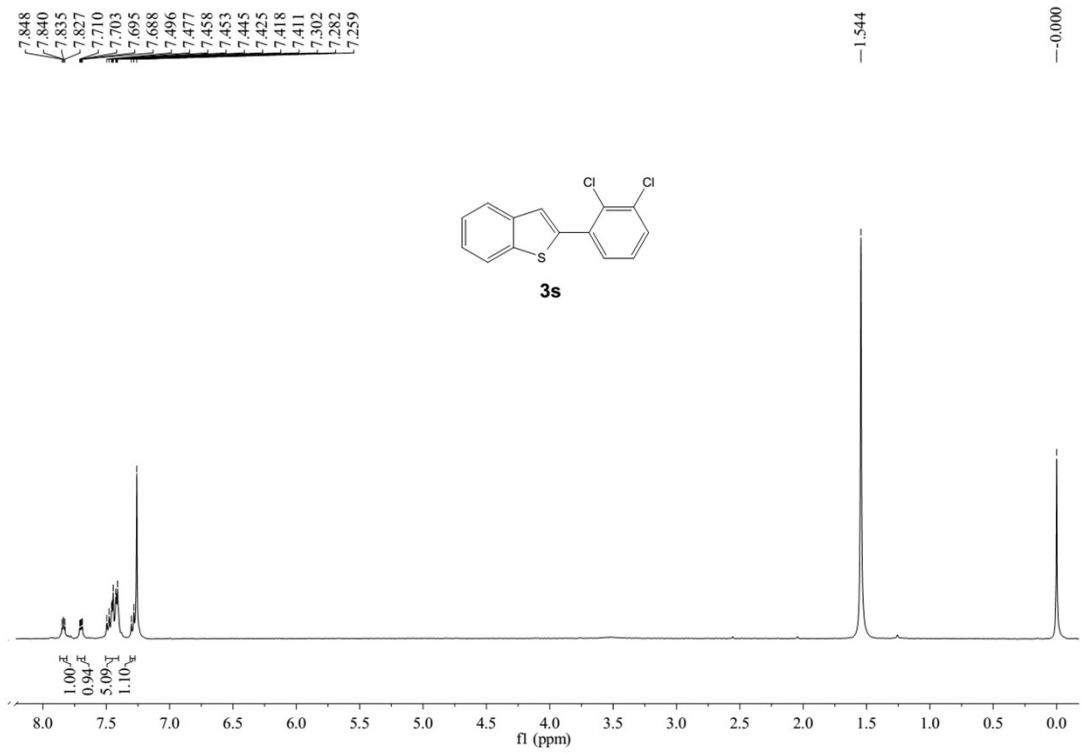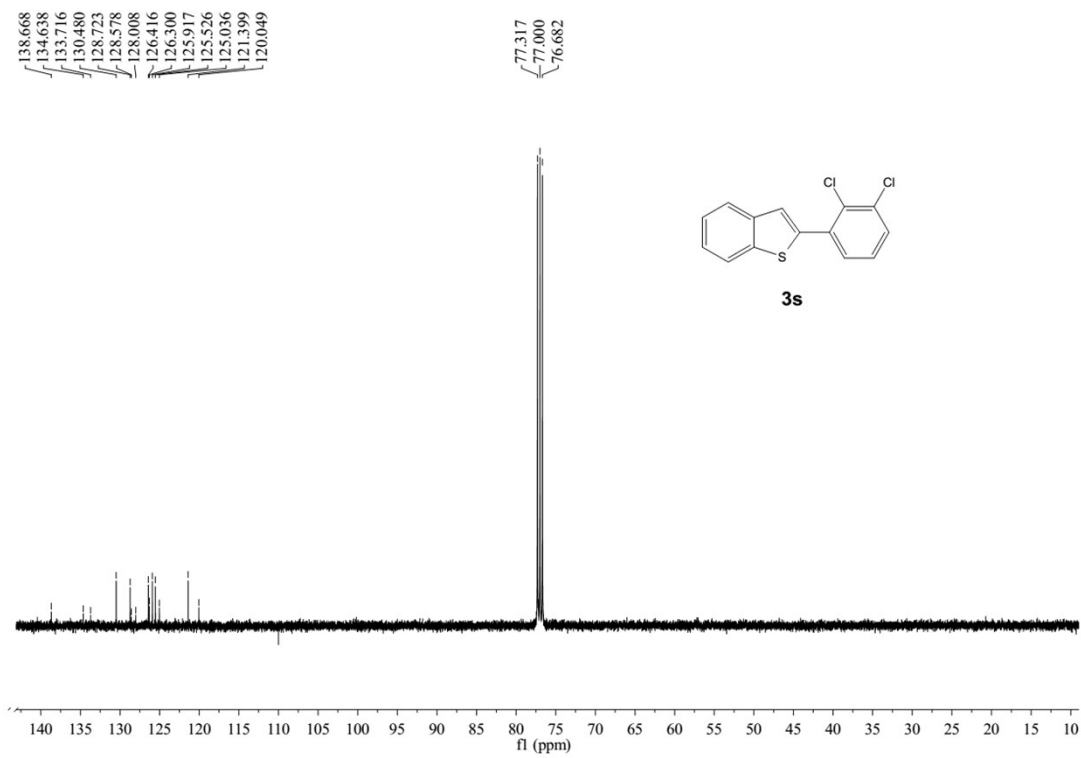



7.852  
7.828  
7.806  
7.561  
7.553  
7.525  
7.515  
7.434  
7.403  
7.371  
7.362  
7.318  
7.298  
7.254

-1.512

-0.009

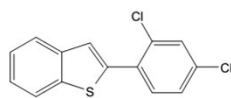

**3t**

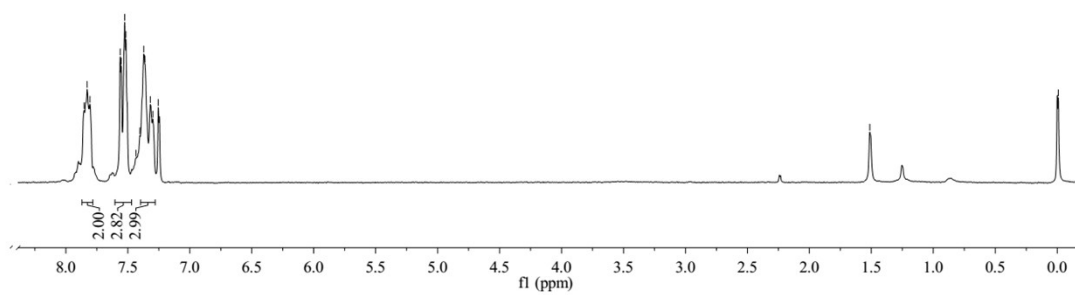

140.155  
139.772  
139.064  
134.513  
133.494  
132.515  
131.855  
130.350  
127.298  
124.764  
124.741  
124.565  
123.944  
122.028

77.318  
77.000  
76.683

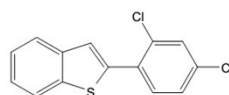

**3t**

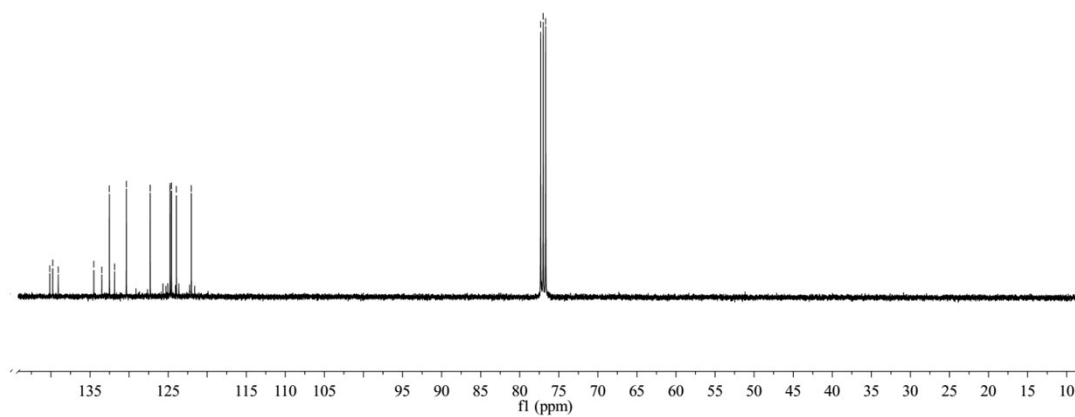

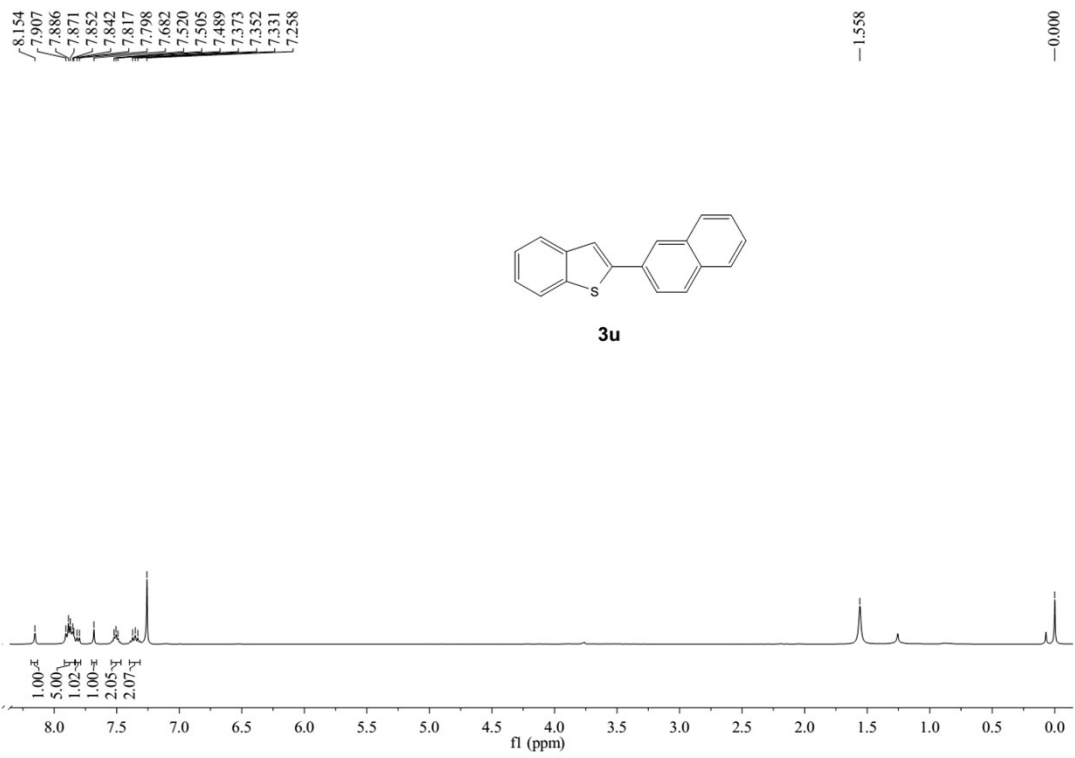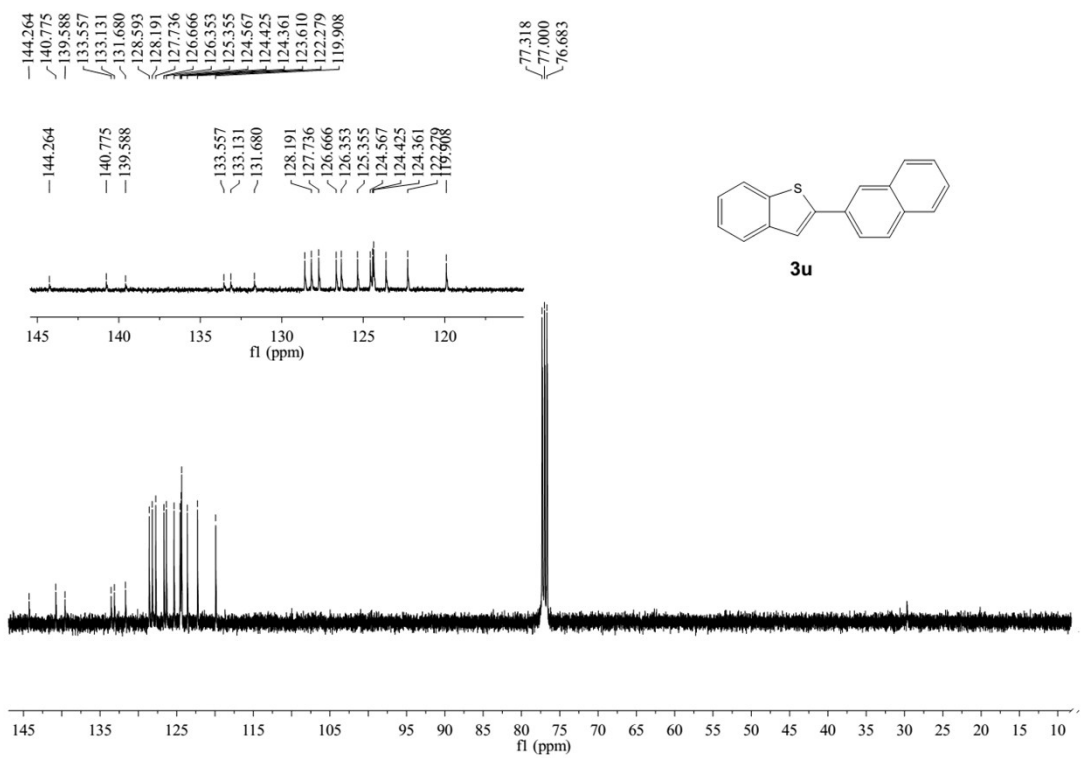

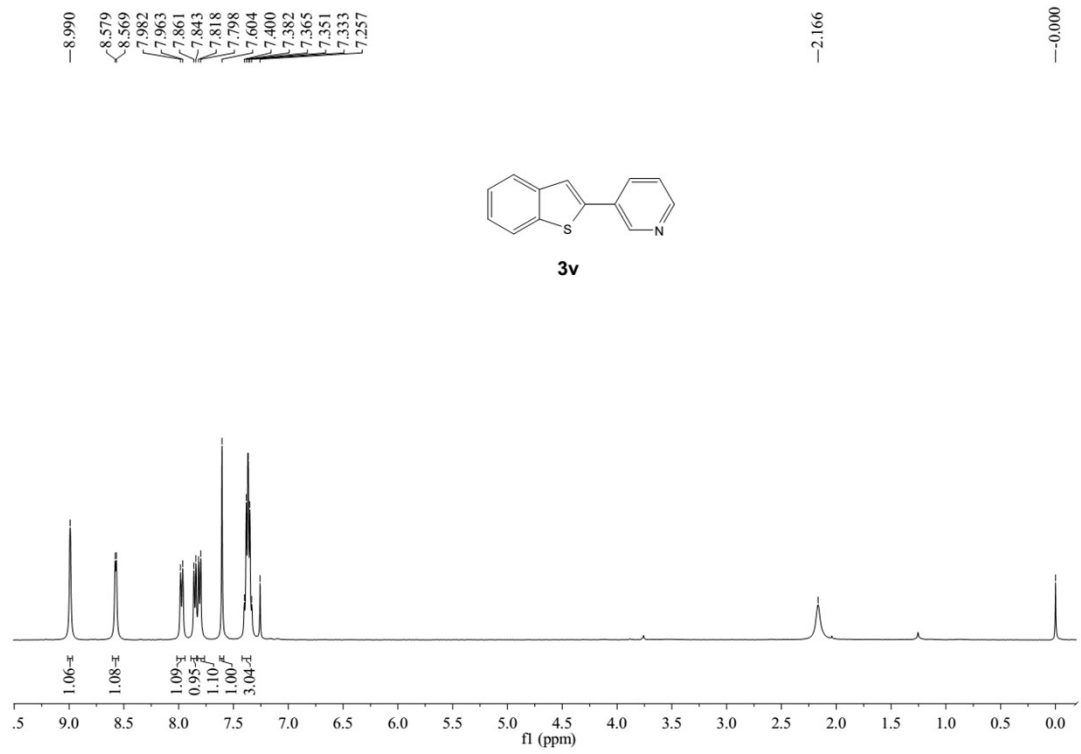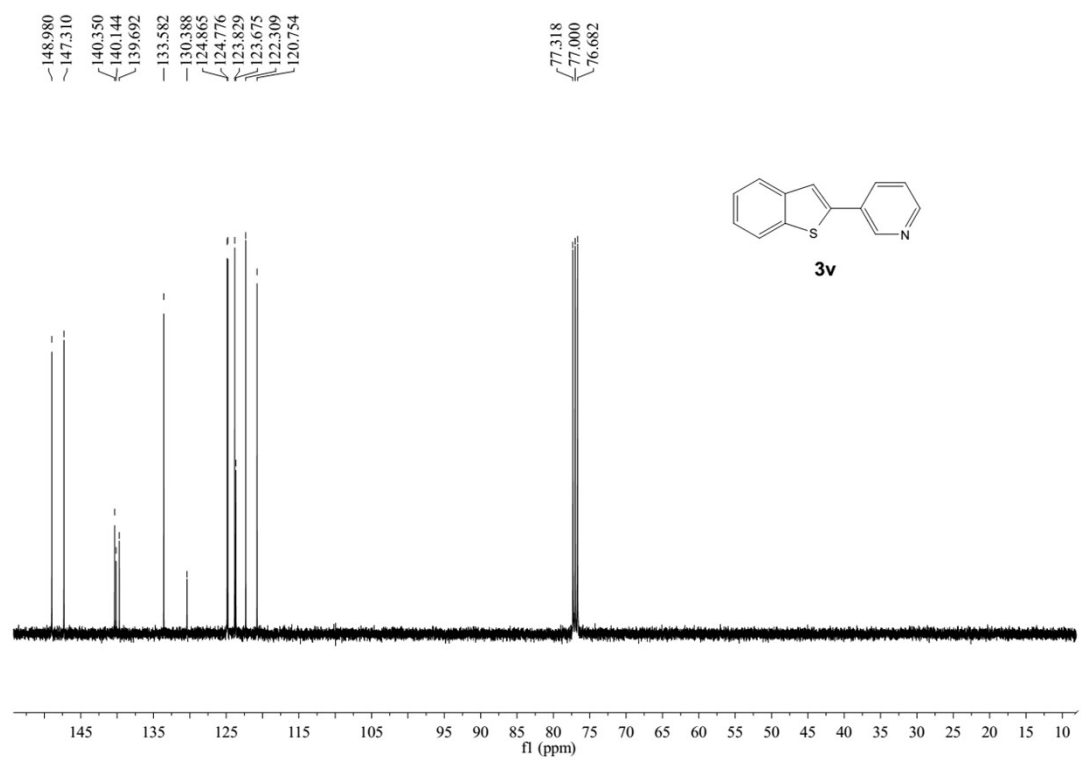

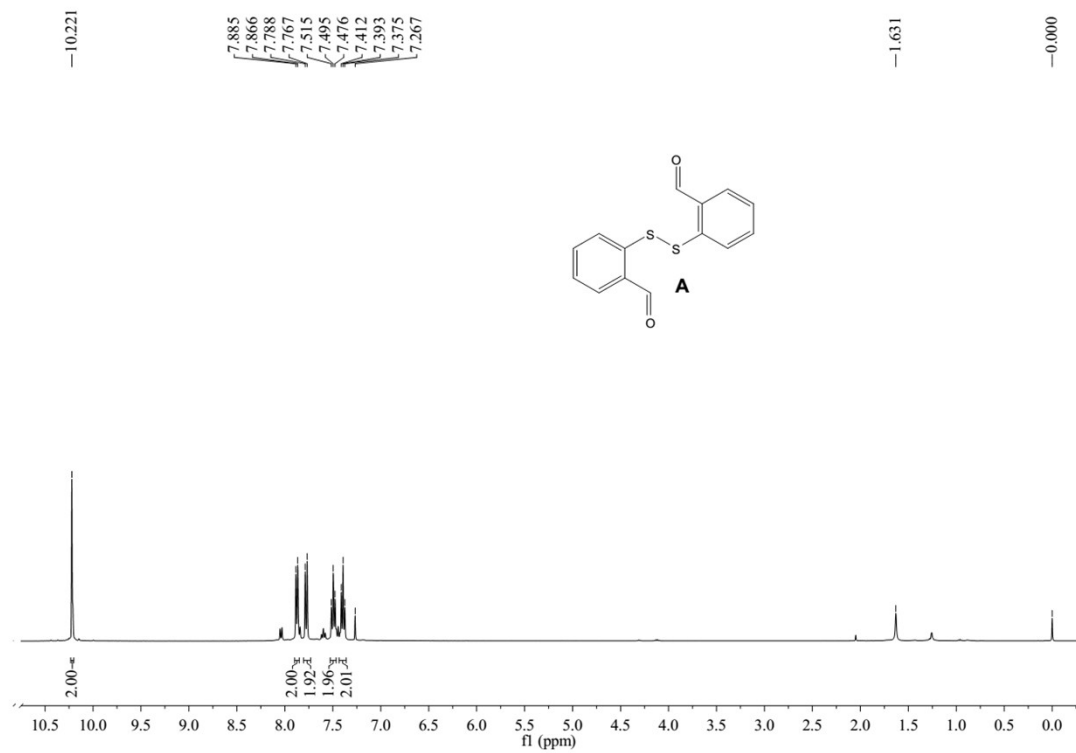

Supplement: c6ra07730g1.pdf [file c6ra07730g1.pdf]
